# Supplementary material for: A highly stable but highly reactive zinc catalyst for transesterification supported by a bis(imidazole) ligand
Source: Royal Society of Chemistry journal article supplement (doi:10.1039/c5gc02056e), 2015-10-14

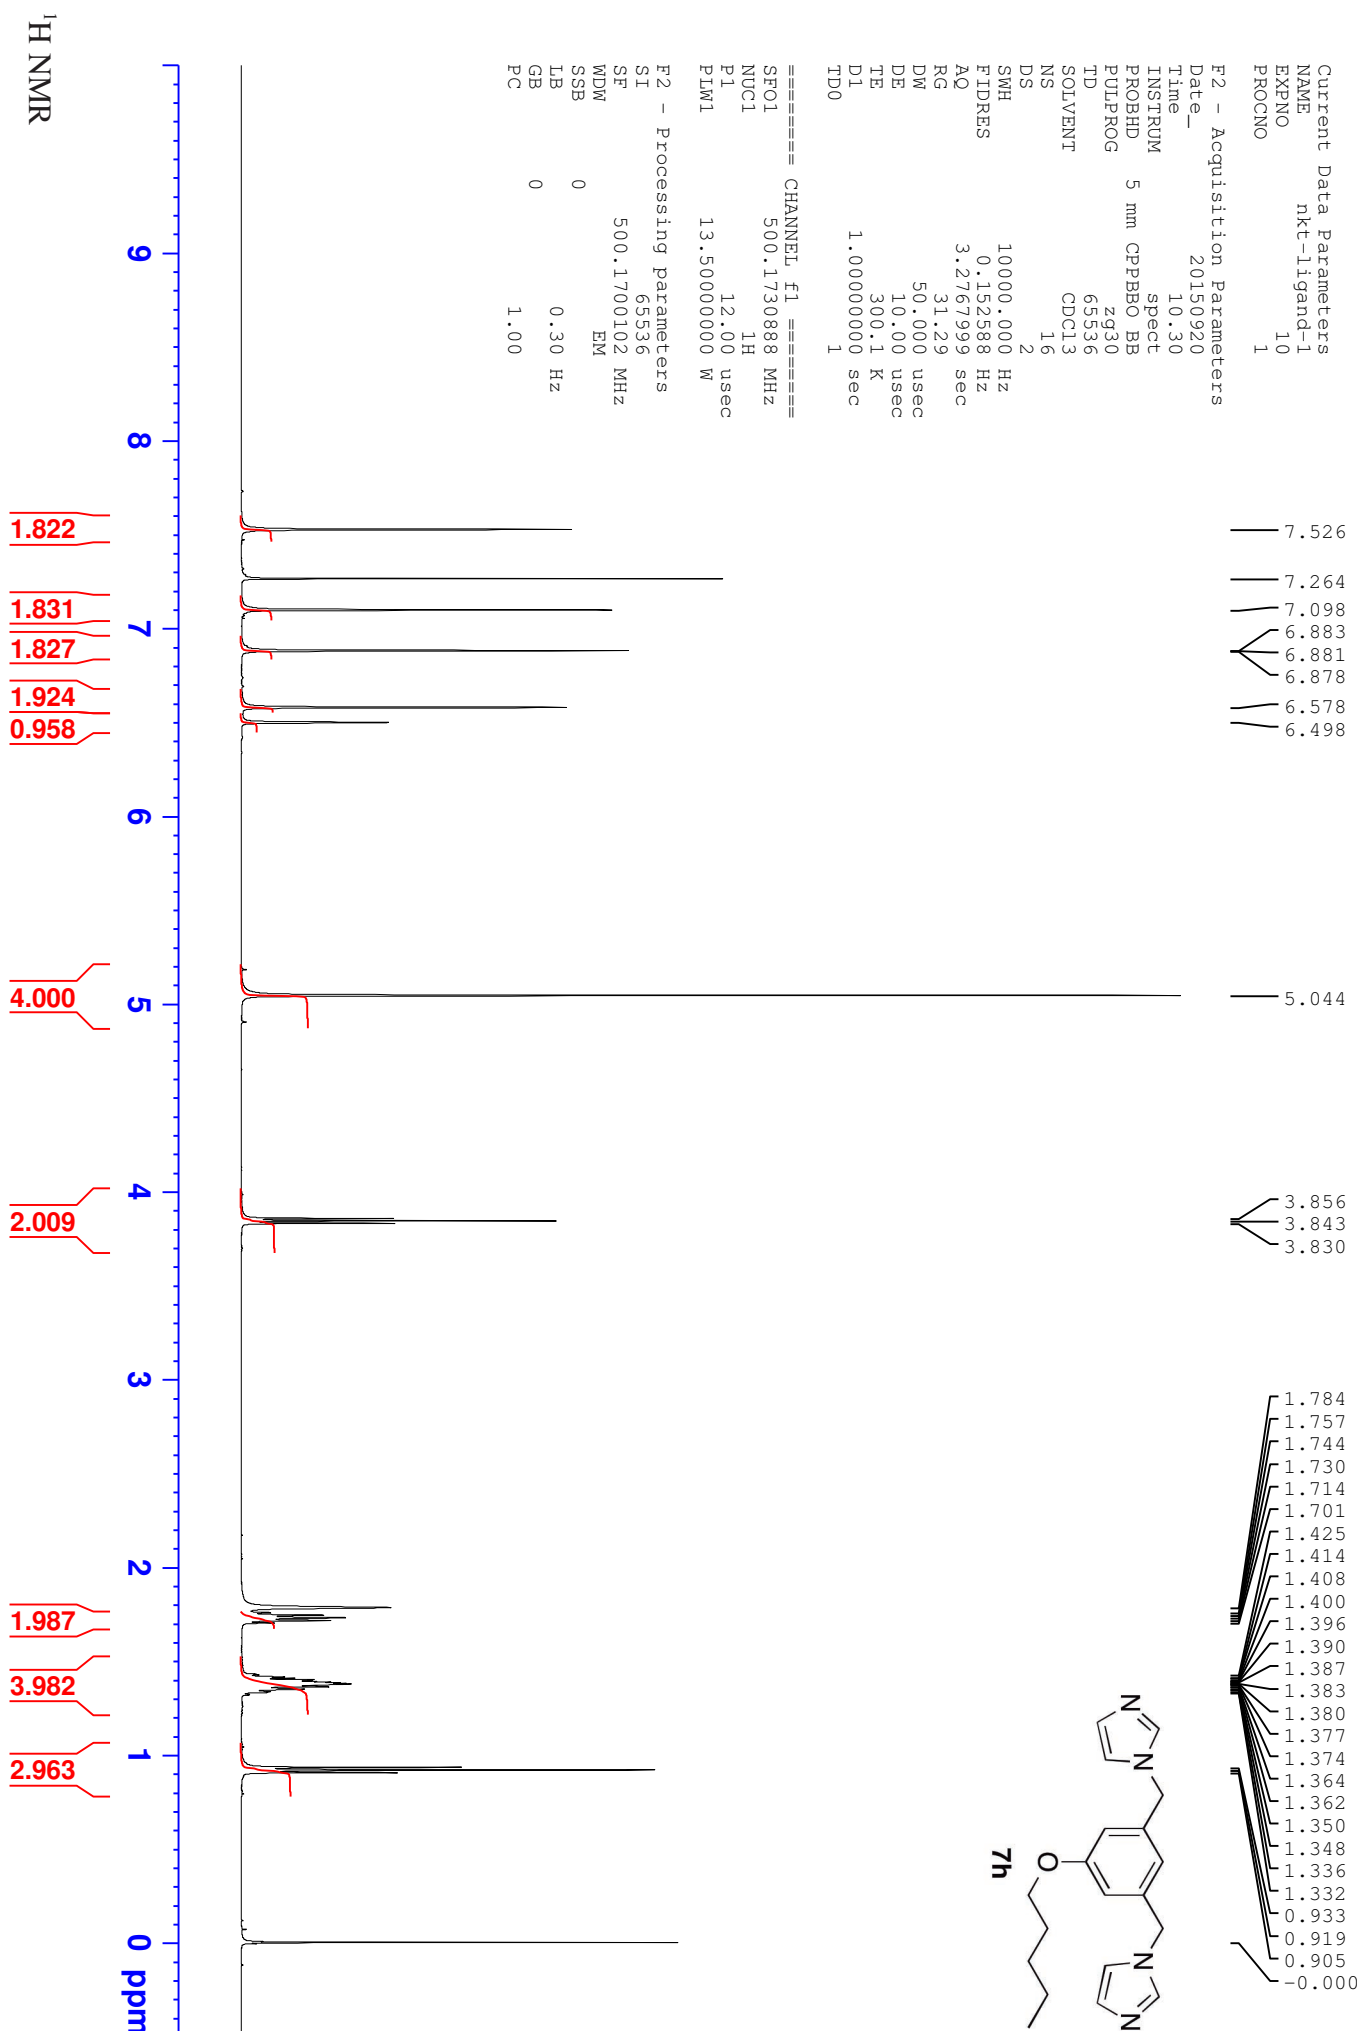

Current Data Parameters  
 NAME nkt-ligand-1  
 EXPNO 11  
 PROCNO 1

F2 - Acquisition Parameters  
 Date\_ 20150920  
 Time 10.33

INSTRUM 5 mm CPPBBO BB  
 PROBHD zgpg30  
 PULPROG 65536  
 SOLVENT CDCl3  
 NS 100  
 DS 4  
 SWH 29761.904 Hz  
 FIDRES 0.454131 Hz  
 AQ 1.1010048 sec  
 RG 189.66  
 DW 16.800 usec  
 DE 11.00 usec  
 TE 300.2 K  
 D1 2.00000000 sec  
 D11 0.03000000 sec  
 TD0 1

==== CHANNEL f1 =====  
 SF01 125.7804227 MHz  
 NUC1 13C  
 P1 10.00 usec  
 PLW1 65.00000000 W

==== CHANNEL f2 =====  
 SF02 500.1720007 MHz  
 NUC2 1H  
 CPDPRG12 waltz16  
 PCPD2 80.00 usec  
 PLW2 13.50000000 W  
 PLW12 0.30375001 W  
 PLW13 0.19440000 W

F2 - Processing parameters  
 SI 32768  
 SF 125.7678470 MHz  
 WDW EM  
 SSB 0  
 LB 1.00 Hz  
 GB 0  
 PC 1.40

- 160.285
- 138.605
- 137.461
- 130.024
- 119.270
- 117.797
- 113.037
- 77.274
- 77.020
- 76.766
- 68.191
- 50.489
- 28.787
- 28.103
- 22.398
- 13.970
- 0.011

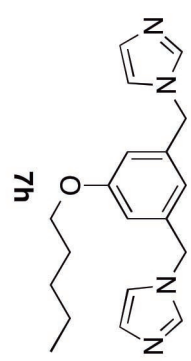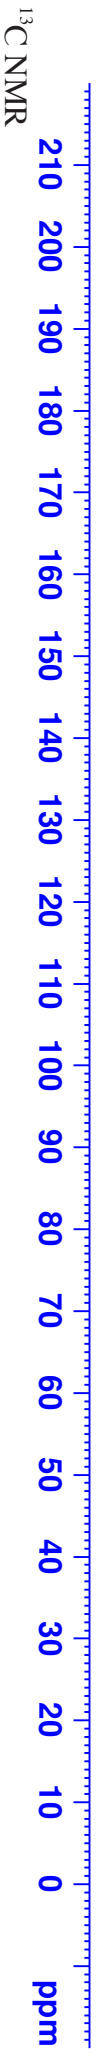

Current Data Parameters  
 NAME nkt666  
 EXPNO 10  
 PROCNO 1

F2 - Acquisition Parameters  
 Date\_ 20150924  
 Time 12.34

INSTRUM spect  
 PROBHD 5 mm CPPBBO BB  
 PULPROG zg30  
 TD 65536  
 SOLVENT CDCl3  
 NS 16  
 DS 2  
 SWH 10000.000 Hz  
 FIDRES 0.152588 Hz  
 AQ 3.2767999 sec  
 RG 31.29  
 DW 50.000 usec  
 DE 10.00 usec  
 TE 300.1 K  
 D1 1.00000000 sec  
 TD0 1

==== CHANNEL f1 =====  
 SFO1 500.1730888 MHz  
 NUC1 1H  
 P1 12.00 usec  
 PLW1 13.50000000 W

F2 - Processing parameters  
 SI 65536  
 SF 500.1700104 MHz  
 WDW EM  
 SSB 0  
 LB 0.30 Hz  
 GB 0  
 PC 1.00

7.995  
7.993  
7.979  
7.977  
7.520  
7.506  
7.505  
7.490  
7.290  
7.284  
7.267  
7.265  
7.131  
6.809  
6.807  
6.805  
5.384  
1.900  
-0.000

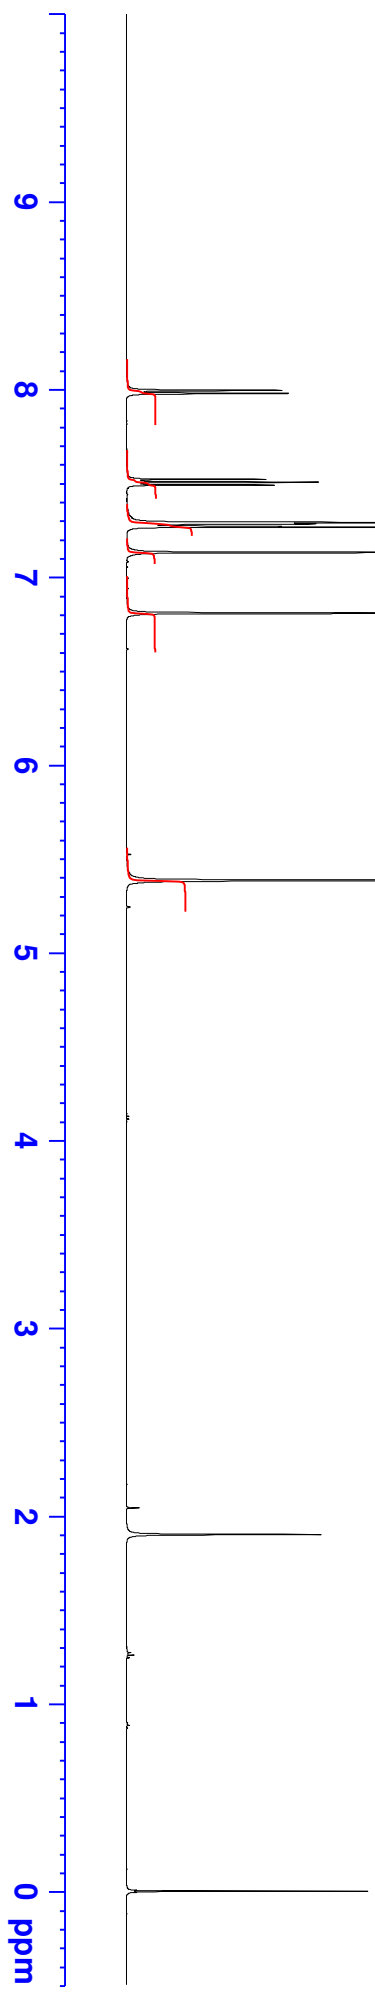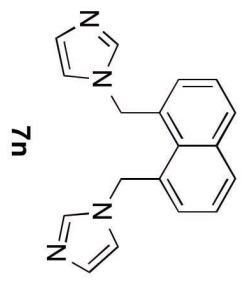

<sup>1</sup>H NMR

Current Data Parameters  
NAME nkt666  
EXPNO 11  
PROCNO 1

F2 - Acquisition Parameters

Date\_ 20150924  
Time 12.36  
INSTRUM spect  
PROBHD 5 mm CPPBBO BB  
PULPROG zgpg30  
TD 65536  
SOLVENT CDCl3  
NS 100  
DS 4  
SWH 29761.904 Hz  
FIDRES 0.454131 Hz  
AQ 1.1010048 sec  
RG 107.18  
DM 16.800 usec  
DE 11.00 usec  
TE 300.1 K  
D1 2.00000000 sec  
D11 0.03000000 sec  
TD0 1

==== CHANNEL F1 =====

SFO1 125.7804227 MHz  
NUC1 13C  
P1 10.00 usec  
PLW1 65.00000000 W

==== CHANNEL F2 =====

SFO2 500.1720007 MHz  
NUC2 1H  
CPDPRG12 waltz16  
PCPD2 80.00 usec  
PLW2 13.50000000 W  
PLW12 0.30375001 W  
PLW13 0.19440000 W

F2 - Processing parameters

SI 32768  
SF 125.7678470 MHz  
WDW EM  
SSB 0  
LB 1.00 Hz  
GB 0  
PC 1.40

136.792  
136.061  
131.684  
131.591  
130.557  
130.329  
129.753  
125.811  
118.786

77.285  
77.031  
76.777

51.531

-0.004

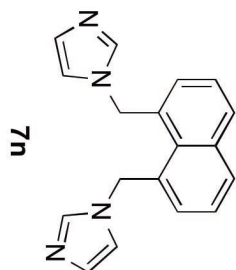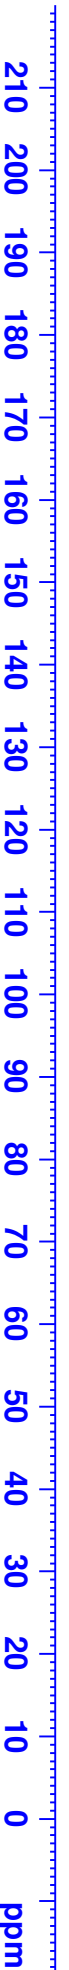

Current Data Parameters  
 NAME nkt-ligand7r  
 EXPNO 10  
 PROCNO 1

F2 - Acquisition Parameters  
 Date\_ 20150920  
 Time 13.50

INSTRUM 5 mm CFPBBO spect  
 PROBHD BB  
 PULPROG zg30  
 TD 65536  
 SOLVENT CDCl3  
 NS 16  
 DS 2  
 SWH 10000.000 Hz  
 FIDRES 0.152588 Hz  
 AQ 3.2767999 sec  
 RG 31.29  
 DW 50.000 usec  
 DE 10.00 usec  
 TE 300.1 K  
 D1 1.00000000 sec  
 TD0 1

==== CHANNEL f1 =====  
 SFO1 500.1730888 MHz  
 NUC1 1H  
 P1 12.00 usec  
 PLW1 13.50000000 W

F2 - Processing parameters  
 SI 65536  
 SF 500.1700069 MHz  
 WDW EM  
 SSB 0  
 LB 0.30 Hz  
 GB 0  
 PC 1.00

- 7.522
- 7.270
- 7.095
- 6.898
- 6.875
- 6.732
- 5.060
- 2.561
- 2.545
- 2.529
- 2.121
- 1.534
- 1.530
- 1.522
- 1.519
- 1.513
- 1.503
- 1.500
- 1.333
- 1.319
- 1.303
- 1.289
- 0.918
- 0.903
- 0.889
- 0.000

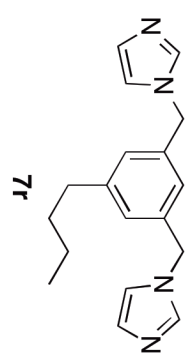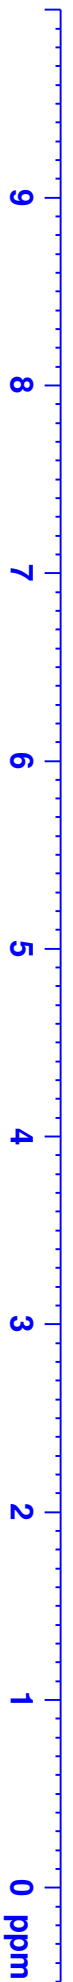

<sup>1</sup>H NMR

Current Data Parameters  
 NAME nkt-1ligand7r  
 EXPNO 11  
 PROCNO 1

F2 - Acquisition Parameters  
 Date\_ 20150920  
 Time 13.57

INSTRUM 5 mm CPPBBO BB  
 PROBHD zgpg30  
 PULPROG 65536  
 TD CDC13  
 SOLVENT 100  
 NS 4

DS 4  
 SWH 29761.904 Hz  
 FIDRES 0.454131 Hz  
 AQ 1.1010048 sec  
 RG 189.66  
 DW 16.800 usec  
 DE 11.00 usec  
 TE 300.1 K  
 D1 2.00000000 sec  
 D11 0.03000000 sec  
 TD0 1

==== CHANNEL f1 =====  
 SFO1 125.7804227 MHz  
 NUC1 13C  
 P1 10.00 usec  
 PLW1 65.00000000 W

==== CHANNEL f2 =====  
 SFO2 500.1720007 MHz  
 NUC2 1H  
 CPDPRG12 waltz16  
 PCPD2 80.00 usec  
 PLW2 13.50000000 W  
 PLW12 0.30375001 W  
 PLW13 0.19440000 W

F2 - Processing parameters  
 SI 32768  
 SF 125.7678470 MHz  
 WDW EM  
 SSB 0  
 LB 1.00 Hz  
 GB 0  
 PC 1.40

144.937  
 137.424  
 137.122  
 129.978  
 127.164  
 123.335  
 119.241

77.297  
 77.044  
 76.790

50.510  
 35.390  
 33.469

22.319  
 13.855  
 -0.011

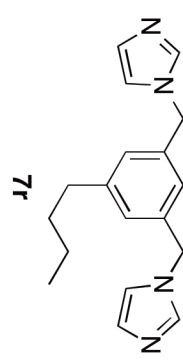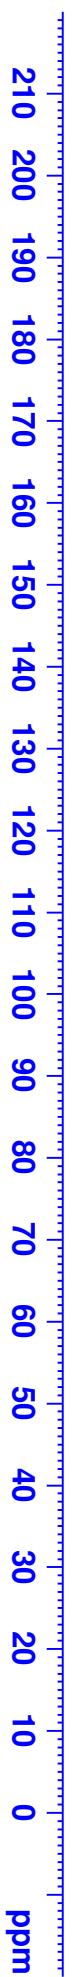

<sup>13</sup>C NMR

Current Data Parameters  
 NAME nkt-ligand7s  
 EXPNO 10  
 PROCNO 1

F2 - Acquisition Parameters  
 Date\_ 20150920  
 Time 13.41

INSTRUM 5 mm CPPBBO BB  
 PROBD 5 mm spect  
 PULPROG zg30

TD 65536  
 SOLVENT CDCl3

NS 16  
 DS 2

SWH 10000.000 Hz  
 FIDRES 0.152588 Hz

RG 3.2767999 sec  
 AO 31.29

DW 50.000 usec  
 DE 10.00 usec

TE 300.1 K  
 D1 1.00000000 sec

TD0 1

==== CHANNEL f1 =====  
 SFO1 500.1730888 MHz  
 NUCL 1H  
 P1 12.00 usec  
 PLW1 13.50000000 W

F2 - Processing parameters  
 SI 65536  
 SF 500.1700113 MHz  
 WDW EM  
 SSB 0  
 GB 0.30 Hz  
 PC 1.00

- 7.531
- 7.262
- 7.097
- 6.955
- 6.953
- 6.881
- 6.879
- 6.717
- 5.064
- 2.955
- 2.940
- 2.935
- 2.920
- 2.905
- 2.900
- 2.885
- 2.046
- 2.044
- 2.031
- 2.026
- 2.023
- 2.020
- 2.016
- 2.013
- 2.011
- 2.008
- 2.002
- 1.991
- 1.987
- 1.787
- 1.780
- 1.774
- 1.770
- 1.763
- 1.758
- 1.744
- 1.736
- 1.718
- 1.705
- 1.688
- 1.682
- 1.672
- 1.666
- 1.656
- 1.651
- 1.647
- 1.500
- 1.492
- 1.488
- 1.486
- 1.480
- 1.475

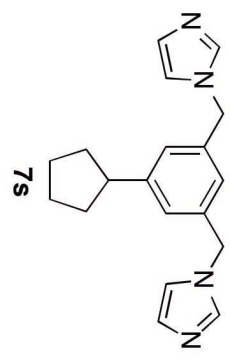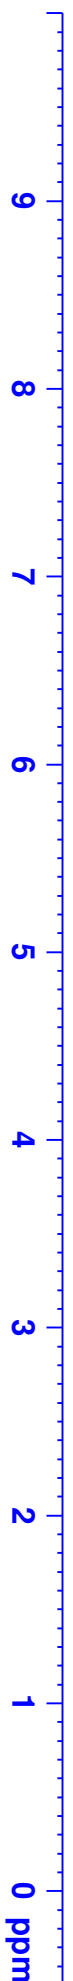

1.854  
 1.891  
 1.939  
 1.840  
 0.952

4.000

0.949

1.955  
 2.111  
 2.739  
 1.854  
 1.985

<sup>1</sup>H NMR

Current Data Parameters  
NAME nkt-119and-3  
EXPNO 10  
PROCNO 1

F2 - Acquisition Parameters  
Date\_ 20150920  
Time 12.13

INSTRUM 5 mm CPPBBO BB  
PROBHD zppg30  
PULPROG 65536  
TD CDC13  
SOLVENT 50  
NS 4

DS 4  
SWH 29761.904 Hz  
FIDRES 0.454131 Hz  
AQ 1.1010048 sec  
RG 189.66  
DW 16.800 usec  
DE 11.00 usec  
TE 300.1 K

D1 2.00000000 sec  
D11 0.03000000 sec  
TD0 1

==== CHANNEL f1 =====

SFO1 125.7804227 MHz  
NUC1 13C  
P1 10.00 usec  
PLW1 65.00000000 W

==== CHANNEL f2 =====

SFO2 500.1720007 MHz  
NUC2 1H  
CPDPRG12 waltz16  
PCPD2 80.00 usec  
PLW2 13.50000000 W  
PLW12 0.30375001 W  
PLW13 0.19440000 W

F2 - Processing parameters

SF 32768  
SF 125.7678470 MHz  
WDW EM  
SSB 0  
LB 1.00 Hz  
GB 0  
PC 1.40

148.656  
137.429  
137.087  
129.954  
125.912  
123.385  
119.256

77.268  
77.014  
76.760

50.592  
45.673

34.593

25.409

-0.010

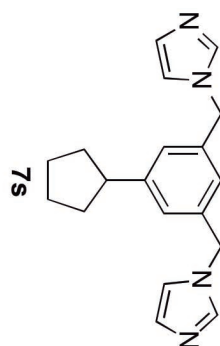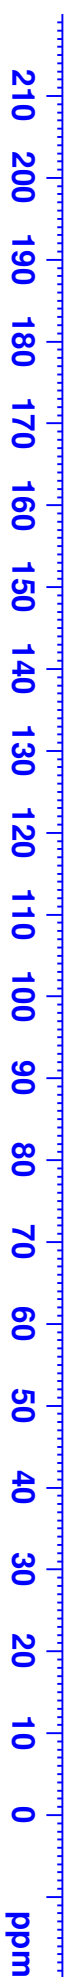

<sup>13</sup>C NMR



Current Data Parameters  
 NAME nkt-Ligand/7t  
 EXPNO 10  
 PROCNO 1

F2 - Acquisition Parameters  
 Date\_ 20150920  
 Time 13.46

INSTRUM spect  
 PROBHD 5 mm CPBB0 BB  
 PULPROG zg30  
 TD 65536  
 SOLVENT CDCl3  
 NS 16  
 DS 2  
 SWH 10000.000 Hz  
 FIDRES 0.152588 Hz  
 AQ 3.2767999 sec  
 RG 31.29  
 DW 50.000 usec  
 DE 10.00 usec  
 TE 300.1 K  
 D1 1.00000000 sec  
 TD0 1

==== CHANNEL f1 =====  
 SFO1 500.1730888 MHz  
 NUCL1 1H  
 P1 12.00 usec  
 PLW1 13.50000000 W

F2 - Processing parameters  
 SI 65536  
 SF 500.1700109 MHz  
 WDW EM  
 SSB 0  
 LB 0.30 Hz  
 GB 0  
 PC 1.00

7.473  
7.470  
7.466  
7.456  
7.454  
7.438  
7.434  
7.424  
7.421  
7.408  
7.384  
7.381  
7.378  
7.367  
7.292  
7.290  
7.263  
7.117  
6.919  
6.890  
5.157  
1.853  
-0.000

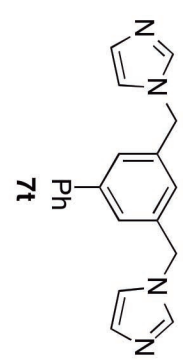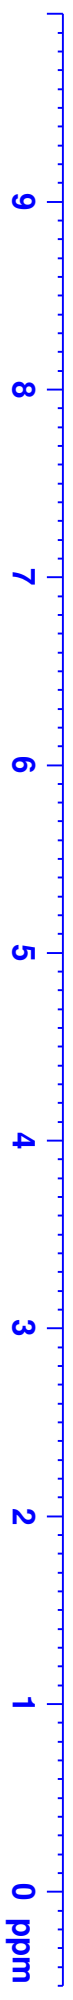

2.027  
3.926  
0.979  
1.907  
0.723  
1.935  
1.940  
0.881

4.000

<sup>1</sup>H NMR

Current Data Parameters  
 NAME nkt-11gand-4  
 EXPNO 10  
 PROCNO 1

F2 - Acquisition Parameters  
 Date\_ 20150920  
 Time 12.30

INSTRUM spect  
 PROBHD 5 mm CPPBBO BB  
 PULPROG zgpg30  
 TD 65536  
 SOLVENT CDCl3  
 NS 70  
 DS 4

SWH 29761.904 Hz  
 FIDRES 0.454131 Hz  
 AQ 1.1010048 sec  
 RG 189.66  
 DW 16.800 usec  
 DE 11.00 usec  
 TE 300.1 K  
 D1 2.00000000 sec  
 D11 0.03000000 sec  
 TD0 1

=====  
 CHANNEL F1 =====  
 SEF01 125.7804227 MHz  
 NUC1 13C  
 P1 10.00 usec  
 PLW1 65.00000000 W

=====  
 CHANNEL F2 =====  
 SEF02 500.1720007 MHz  
 NUC2 1H  
 CPDPRG12 waltz16  
 PCPD2 80.00 usec  
 PLW2 13.50000000 W  
 PLW12 0.30375001 W  
 PLW13 0.19440000 W

F2 - Processing parameters  
 SI 32768  
 SF 125.7678470 MHz  
 MWDW EM  
 SSB 0  
 LB 1.00 Hz  
 GB 0  
 PC 1.40

143.124  
 139.599  
 137.852  
 137.470  
 130.162  
 128.984  
 128.102  
 127.121  
 125.849  
 124.614  
 119.262

77.286  
 77.031  
 76.778

50.515

-0.005

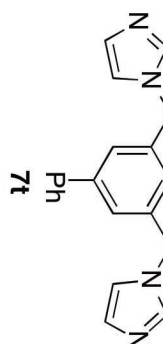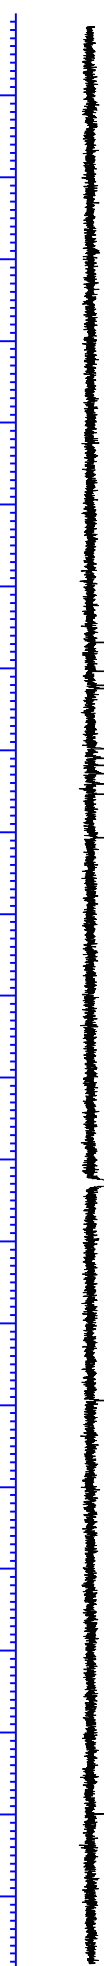

<sup>13</sup>C NMR

210 200 190 180 170 160 150 140 130 120 110 100 90 80 70 60 50 40 30 20 10 0 ppm

Current Data Parameters  
NAME nkt-Ligand7u  
EXPNO 10  
PROCNO 1

F2 - Acquisition Parameters  
Date\_ 20150920  
Time 14.02

INSTRUM spect  
PROBHD 5 mm CPPBBO BB  
PULPROG zg30  
TD 65536  
SOLVENT CDCl3  
NS 16  
DS 2  
SWH 10000.000 Hz  
FIDRES 0.152588 Hz  
AQ 3.2767999 sec  
RG 31.29  
DW 50.000 usec  
DE 10.00 usec  
TE 300.1 K  
D1 1.00000000 sec  
TD0 1

==== CHANNEL f1 =====  
SFO1 500.1730888 MHz  
NUC1 1H  
P1 12.00 usec  
PLM1 13.50000000 W

F2 - Processing parameters  
SI 65536  
SF 500.1700079 MHz  
WDW EM  
SSB 0  
LB 0.30 Hz  
GB 0  
PC 1.00

7.525  
7.269  
7.080  
6.889  
6.358  
6.265  
5.021  
2.891  
-0.000

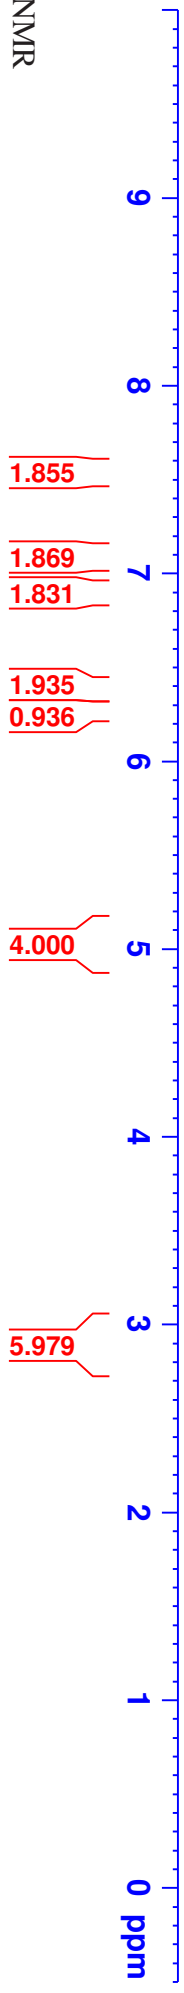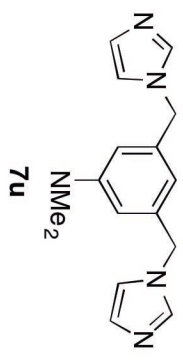

<sup>1</sup>H NMR

Current Data Parameters  
 NAME nkt-ligand7u  
 EXPNO 11  
 PROCNO 1

F2 - Acquisition Parameters  
 Date\_ 20150920  
 Time 14.08

INSTRUM spect  
 PROBHD 5 mm CPBPBBO BB  
 PULPROG zgpg30  
 TD 65536  
 SOLVENT CDCl3  
 NS 100  
 DS 4

SWH 29761.904 Hz  
 FIDRES 0.454131 Hz  
 AQ 1.1010048 sec  
 RG 189.66  
 DW 16.800 usec  
 DE 11.00 usec  
 TE 300.2 K

D1 2.00000000 sec  
 D11 0.03000000 sec  
 TD0 1

==== CHANNEL F1 =====  
 SFO1 125.7804227 MHz  
 NUC1 13C  
 P1 10.00 usec  
 PLW1 65.00000000 W

==== CHANNEL F2 =====  
 SFO2 500.1720007 MHz  
 NUC2 1H  
 CPDPRG12 waltz16  
 PCPD2 80.00 usec  
 PLW2 13.50000000 W  
 PLW12 0.30375001 W  
 PLW13 0.19440000 W

F2 - Processing parameters  
 SI 32768  
 SF 125.7678470 MHz  
 MDM EM  
 SSB 0  
 LB 1.00 Hz  
 GB 0  
 PC 1.40

151.271  
 137.961  
 137.484  
 129.799  
 119.324  
 113.667  
 110.445

77.298  
 77.044  
 76.790

50.988  
 40.279

-0.005

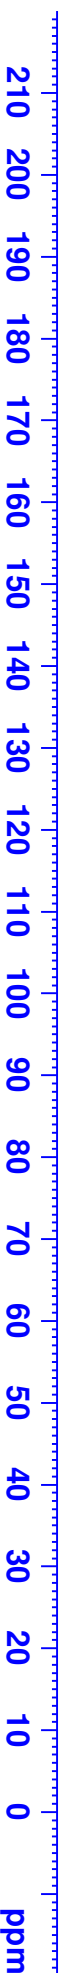

Current Data Parameters  
 NAME NKT tbu complex  
 EXPNO 10  
 PROCNO 1

8.036  
 7.261  
 7.207  
 7.205  
 7.192  
 6.940  
 6.938  
 6.935  
 6.801

5.115

1.681  
 1.279  
 -0.000

F2 - Acquisition Parameters  
 Date\_ 20140807  
 Time 19.58  
 INSTRUM spect  
 PROBHD 5 mm CPPBBO BB  
 PULPROG zg30  
 TD 65536  
 SOLVENT CDCl3  
 NS 16  
 DS 2  
 SMH 10000.000 Hz  
 FIDRES 0.152588 Hz  
 AQ 3.2767999 sec  
 RG 31.29  
 DW 50.000 usec  
 DE 10.00 usec  
 TE 300.0 K  
 D1 1.00000000 sec  
 ID0 1

==== CHANNEL f1 =====  
 SFO1 500.1730888 MHz  
 NUC1 1H  
 P1 12.00 usec  
 PLW1 13.50000000 W

F2 - Processing parameters  
 SI 65536  
 SF 500.1700120 MHz  
 WDW EM  
 SSB 0  
 LB 0.30 Hz  
 GB 0  
 PC 1.00

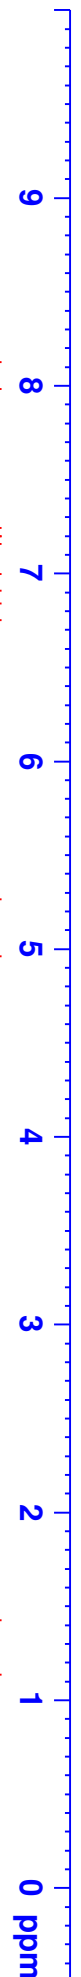

<sup>1</sup>H NMR

Zinc Complex 8c

Current Data Parameters  
NAME NKT tbu complex  
EXPNO 11  
PROCNO 1

F2 - Acquisition Parameters

Date\_ 20140807  
Time 20.04  
INSTRUM spect  
PROBHD 5 mm CPBBO BB  
PULPROG zgpg30  
TD 65536  
SOLVENT CDCl3  
NS 161  
DS 4  
SMH 29761.904 Hz  
FIDRES 0.454131 Hz  
AQ 1.1010048 sec  
RG 189.66  
DW 16.800 usec  
DE 11.00 usec  
TE 300.0 K  
D1 2.0000000 sec  
D11 0.0300000 sec  
TD0 1

==== CHANNEL F1 =====

SFO1 125.7804227 MHz  
NUC1 13C  
P1 10.00 usec  
PLW1 65.0000000 W

==== CHANNEL F2 =====

SFO2 500.1720007 MHz  
NUC2 1H  
CPDPRG12 waltz16  
PCPD2 80.00 usec  
PLW2 13.5000000 W  
PLW12 0.30375001 W  
PLW13 0.19440000 W

F2 - Processing parameters

SI 32768  
SF 125.7678470 MHz  
WDW EM  
SSB 0  
LB 1.00 Hz  
GB 0  
PC 1.40

153.506  
138.611  
136.035  
128.979  
125.083  
124.000  
119.738  
77.267  
77.013  
76.758  
51.371  
34.812  
31.148  
-0.007

Zinc Complex 8c

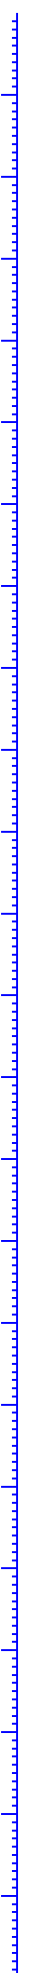

<sup>13</sup>C NMR

Current Data Parameters  
NAME nkt239,240  
EXPNO 10  
PROCNO 1

F2 - Acquisition Parameters

Date\_ 20140618  
Time 21.44  
INSTRUM spect  
PROBHD 5 mm CPPBBO BB  
PULPROG zg30  
TD 65536  
SOLVENT GDCL3  
NS 4  
DS 1  
SWH 8012.820 Hz  
FIDRES 0.122266 Hz  
AQ 4.0894465 sec  
RG 15.99  
DW 62.400 usec  
DE 10.00 usec  
TE 300.0 K  
D1 1.00000000 sec  
TD0 1

==== CHANNEL f1 =====  
SFO1 500.1730010 MHz  
NUC1 1H  
P1 12.00 usec  
PLW1 13.50000000 W

F2 - Processing parameters  
SI 65536  
SF 500.1700018 MHz  
WDW EM  
SSB 0  
LB 0.30 Hz  
GB 0  
PC 1.00

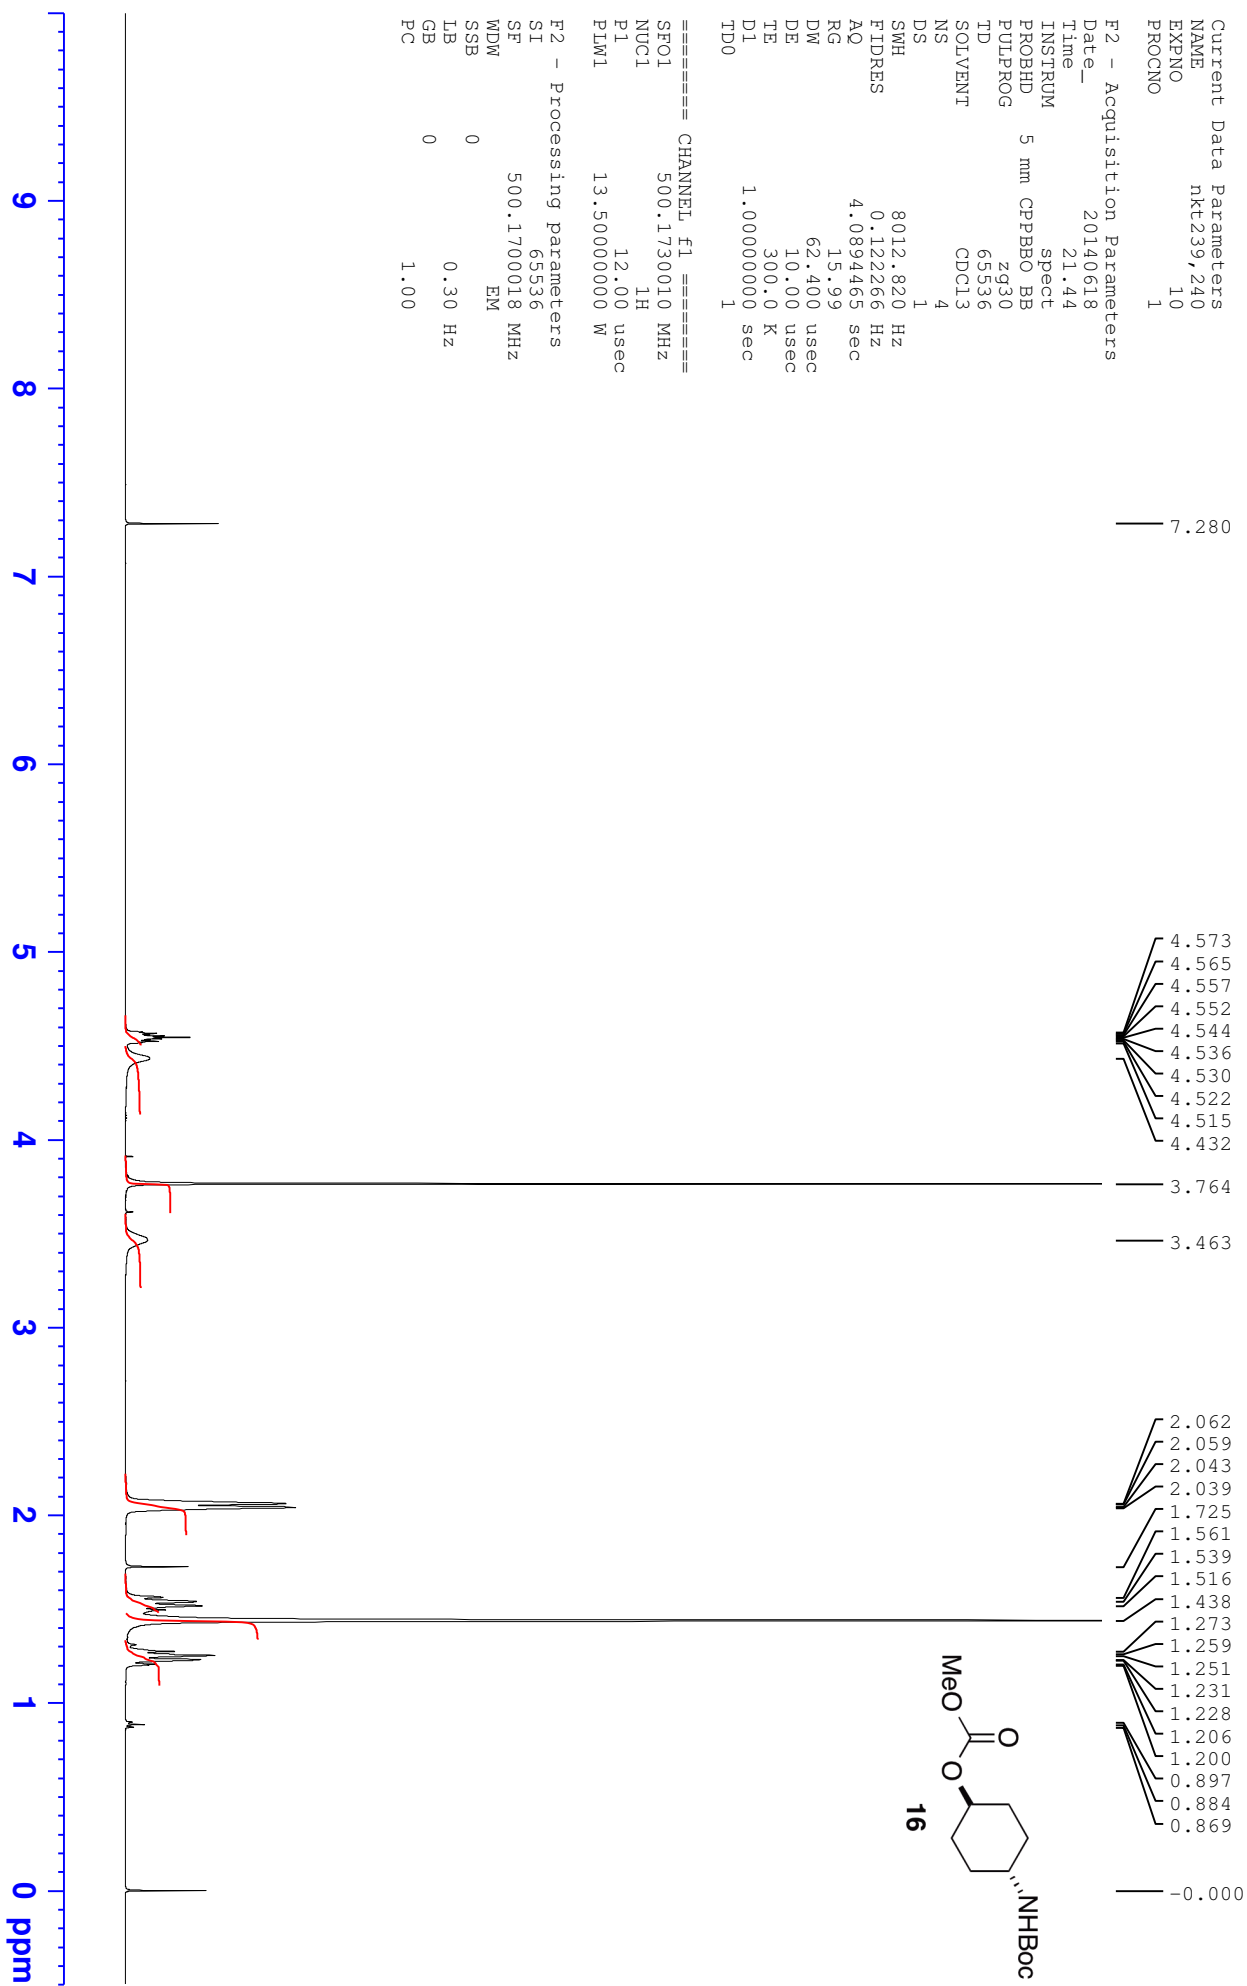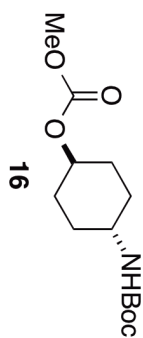

<sup>1</sup>H NMR

Current Data Parameters  
 NAME nkt239,240  
 EXPNO 11  
 PROCNO 1

F2 - Acquisition Parameters  
 Date\_ 20140618  
 Time 21.48

INSTRUM 5 mm QNPBB0 BB  
 PROBHD spect  
 PULPROG zgpg30  
 TD 65536  
 SOLVENT CDCl3  
 NS 90  
 DS 4

SWH 29761.904 Hz  
 FIDRES 0.454131 Hz  
 AQ 1.1010048 sec  
 RG 189.66  
 DW 16.800 usec  
 DE 11.00 usec  
 TE 300.0 K  
 D1 2.00000000 sec  
 D11 0.03000000 sec  
 TD0 1

==== CHANNEL F1 =====  
 SFO1 125.7804227 MHz  
 NUC1 13C  
 P1 10.00 usec  
 PLW1 65.00000000 W

==== CHANNEL F2 =====  
 SFO2 500.1720007 MHz  
 NUC2 1H  
 CPDPRG12 waltz16  
 PCPD2 80.00 usec  
 PLW2 13.50000000 W  
 PLW12 0.30375001 W  
 PLW13 0.19440000 W

F2 - Processing parameters  
 SI 32768  
 SF 125.7678470 MHz  
 WDW EM  
 SSB 0  
 LB 1.00 Hz  
 GB 0  
 PC 1.40

155.191

79.310  
 77.290  
 77.036  
 76.782  
 75.871

54.549

48.381

30.620  
 29.881  
 28.383

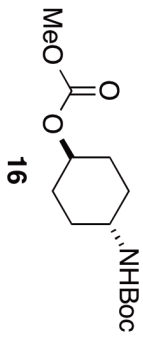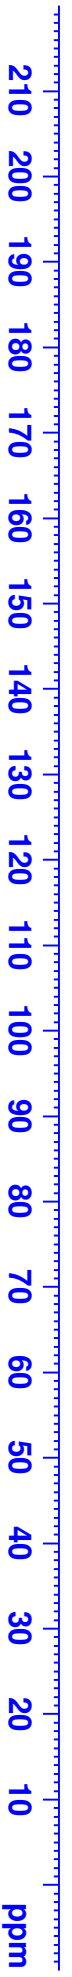

<sup>13</sup>C NMR



Current Data Parameters  
NAME nkt106  
EXPNO 10  
PROCNO 1

F2 - Acquisition Parameters  
Date\_ 20131126  
Time 22.04

INSTRUM 5 mm CFPBBO BB  
PROBHD spect  
PULPROG zg30  
TD 65536  
SOLVENT GDC13  
NS 2  
DS 1

SWH 8012.820 Hz  
FIDRES 0.122266 Hz  
AQ 4.0894465 sec  
RG 31.29

DW 62.400 usec  
DE 10.00 usec  
TE 300.0 K  
D1 1.00000000 sec  
TD0 1

==== CHANNEL f1 =====  
SFO1 500.1730010 MHz  
NUC1 1H  
P1 12.00 usec  
PLW1 19.70000076 W

F2 - Processing parameters  
SI 65536  
SF 500.1700115 MHz  
WDW EM  
SSB 0  
LB 0.30 Hz  
GB 0  
PC 1.00

7.259  
6.922  
6.842

4.666  
4.654

3.983  
3.970  
3.956

1.812  
1.799  
1.785  
1.783  
1.769  
1.756  
1.722  
1.710  
1.698  
1.569  
1.457  
1.451  
1.443  
1.439  
1.434  
1.430  
1.426  
1.420  
1.417  
1.412  
1.404  
1.392  
1.390  
1.376  
1.363  
1.360  
0.946  
0.917  
-0.000

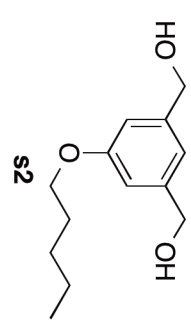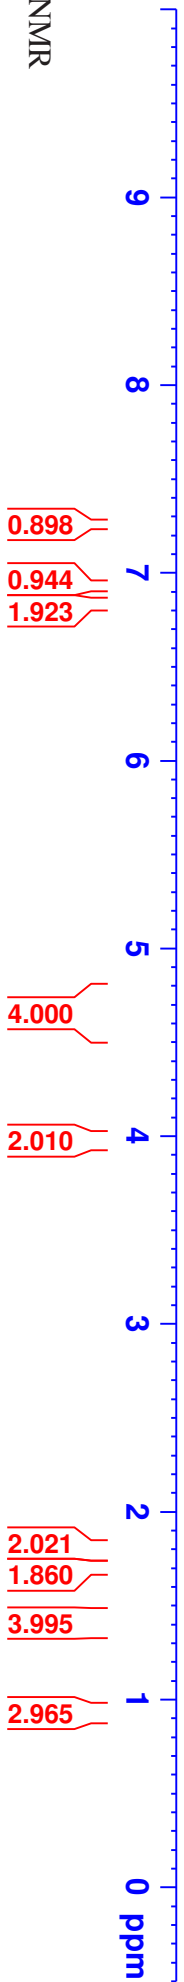

Current Data Parameters  
 NAME nkt106(s-2)  
 EXPNO 10  
 PROCNO 1

F2 - Acquisition Parameters  
 Date\_ 20140527  
 Time 14.49

INSTRUM spect  
 PROBHD 5 mm CPPBBO BB  
 PULPROG zgpg30  
 TD 65536  
 SOLVENT CDCl3  
 NS 51  
 DS 4  
 SWH 29761.904 Hz  
 FIDRES 0.454131 Hz  
 AQ 1.1010048 sec  
 RG 107.18  
 DW 16.800 usec  
 DE 11.00 usec  
 TE 300.0 K  
 D1 2.00000000 sec  
 D11 0.03000000 sec  
 TD0 1

==== CHANNEL F1 =====  
 SFO1 125.7804227 MHz  
 NUC1 13C  
 P1 10.00 usec  
 PLW1 65.00000000 W

==== CHANNEL F2 =====  
 SFO2 500.1720007 MHz  
 NUC2 1H  
 CPDPRG12 waltz16  
 PCPD2 80.00 usec  
 PLW2 13.50000000 W  
 PLW12 0.30375001 W  
 PLW13 0.19440000 W

F2 - Processing parameters  
 SI 32768  
 SF 125.7678470 MHz  
 WDDW EM  
 SSB 0  
 LB 1.00 Hz  
 GB 0  
 PC 1.40

- 159.740
- 142.748
- 117.299
- 112.190
- 77.270
- 77.016
- 76.763
- 68.086
- 65.231
- 28.963
- 28.204
- 22.448
- 14.020

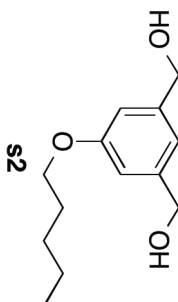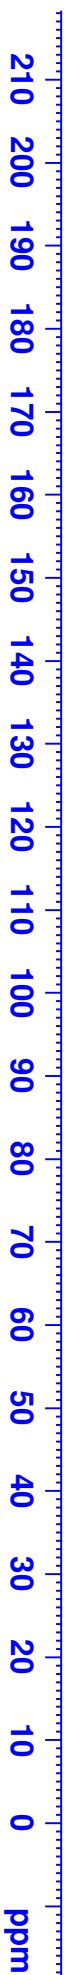

<sup>13</sup>C NMR

Current Data Parameters  
 NAME nkt108  
 EXPNO 10  
 PROCNO 1

F2 - Acquisition Parameters  
 Date\_ 20131128  
 Time 14.38

INSTRUM 5 mm CPPBBO BB  
 SPECT spect  
 PROBHD zq30  
 PULPROG 65536  
 TD 65536  
 SOLVENT GDC13  
 NS 16  
 DS 2  
 SWH 10000.000 Hz  
 FIDRES 0.152588 Hz  
 AQ 3.2767999 sec  
 RG 23.8  
 DW 50.000 usec  
 DE 10.000 usec  
 TE 300.0 K  
 D1 1.00000000 sec  
 TD0 1

==== CHANNEL f1 =====  
 SFO1 500.1730888 MHz  
 NUC1 1H  
 P1 12.00 usec  
 PLW1 19.70000076 W

F2 - Processing parameters  
 SI 65536  
 SF 500.1700127 MHz  
 WDW EM  
 SSB 0  
 LB 0.30 Hz  
 GB 0  
 PC 1.00

- 7.257
- 6.972
- 6.880
- 6.878
- 4.537
- 3.980
- 3.967
- 3.954
- 1.815
- 1.802
- 1.788
- 1.786
- 1.772
- 1.759
- 1.531
- 1.461
- 1.455
- 1.447
- 1.443
- 1.438
- 1.434
- 1.431
- 1.424
- 1.421
- 1.416
- 1.408
- 1.396
- 1.394
- 1.380
- 1.367
- 1.364
- 0.950
- 0.936
- 0.922
- 0.000

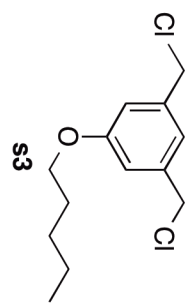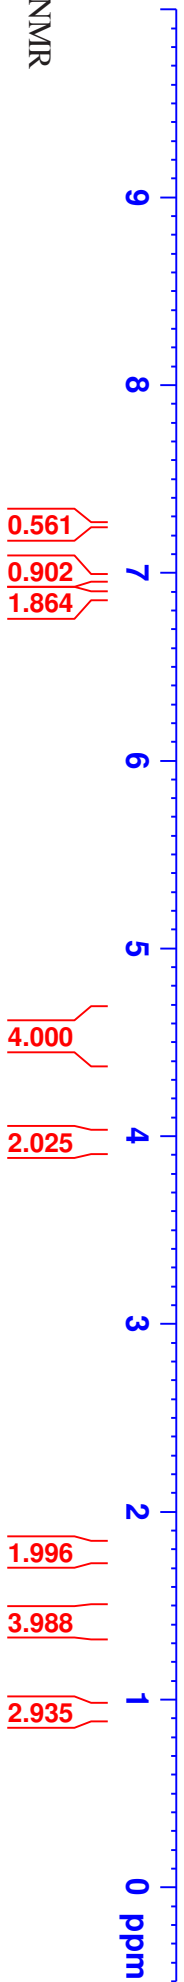

Current Data Parameters  
 NAME nkt108 (s-3)  
 EXPNO 10  
 PROCNO 1

F2 - Acquisition Parameters  
 Date\_ 20140527  
 Time 14.44

INSTRUM spect  
 PROBHD 5 mm CPPBBO BB  
 PULPROG zgpg30  
 TD 65536  
 SOLVENT CDCl3  
 NS 43  
 DS 4

SWH 29761.904 Hz  
 FIDRES 0.454131 Hz  
 AQ 1.1010048 sec  
 RG 107.18  
 DW 16.800 usec  
 DE 11.00 usec  
 TE 300.0 K  
 D1 2.0000000 sec  
 D11 0.0300000 sec  
 TD0 1

==== CHANNEL f1 =====  
 SFO1 125.7804227 MHz  
 NUC1 13C  
 P1 10.00 usec  
 PLW1 65.00000000 W

==== CHANNEL f2 =====  
 SFO2 500.1720007 MHz  
 NUC2 1H  
 CPDPRG12 waltz16  
 PCPD2 80.00 usec  
 PLW2 13.50000000 W  
 PLW12 0.30375001 W  
 PLW13 0.19440000 W

F2 - Processing parameters  
 SI 32768  
 SF 125.7678470 MHz  
 WDW EM  
 SSB 0  
 LB 1.00 Hz  
 GB 0  
 PC 1.40

159.666  
 139.258  
 120.628  
 114.685  
 77.273  
 77.019  
 76.764  
 68.208  
 45.867  
 28.890  
 28.177  
 22.440  
 14.010  
 -0.003

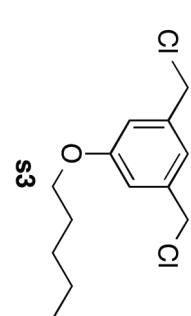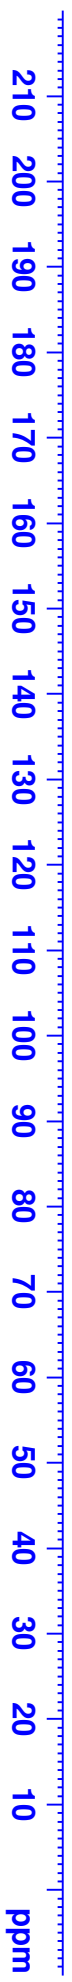

Current Data Parameters  
NAME nkt173  
EXPNO 10  
PROCNO 1

F2 - Acquisition Parameters  
Date\_ 20140310  
Time 21.44

INSTRUM spect  
PROBHD 5 mm CPPBBO BB  
PULPROG zg30  
TD 65536  
SOLVENT CDCl3

NS 4  
DS 1  
SWH 8012.820 Hz  
FIDRES 0.122266 Hz  
AQ 4.0894465 sec

RG 31.29  
DW 62.400 usec  
DE 10.00 usec  
TE 300.0 K  
D1 1.00000000 sec  
TD0 1

==== CHANNEL f1 =====  
SFO1 500.1730010 MHz  
NUC1 1H  
P1 12.00 usec  
PLW1 19.70000076 W

F2 - Processing parameters  
SI 65536  
SF 500.1700136 MHz  
WDW EM  
SSB 0  
LB 0.30 Hz  
GB 0  
PC 1.00

7.260  
6.752  
6.673  
6.670  
4.541  
2.981  
1.532

12.170  
0.960  
1.958  
4.000  
6.182  
4.705

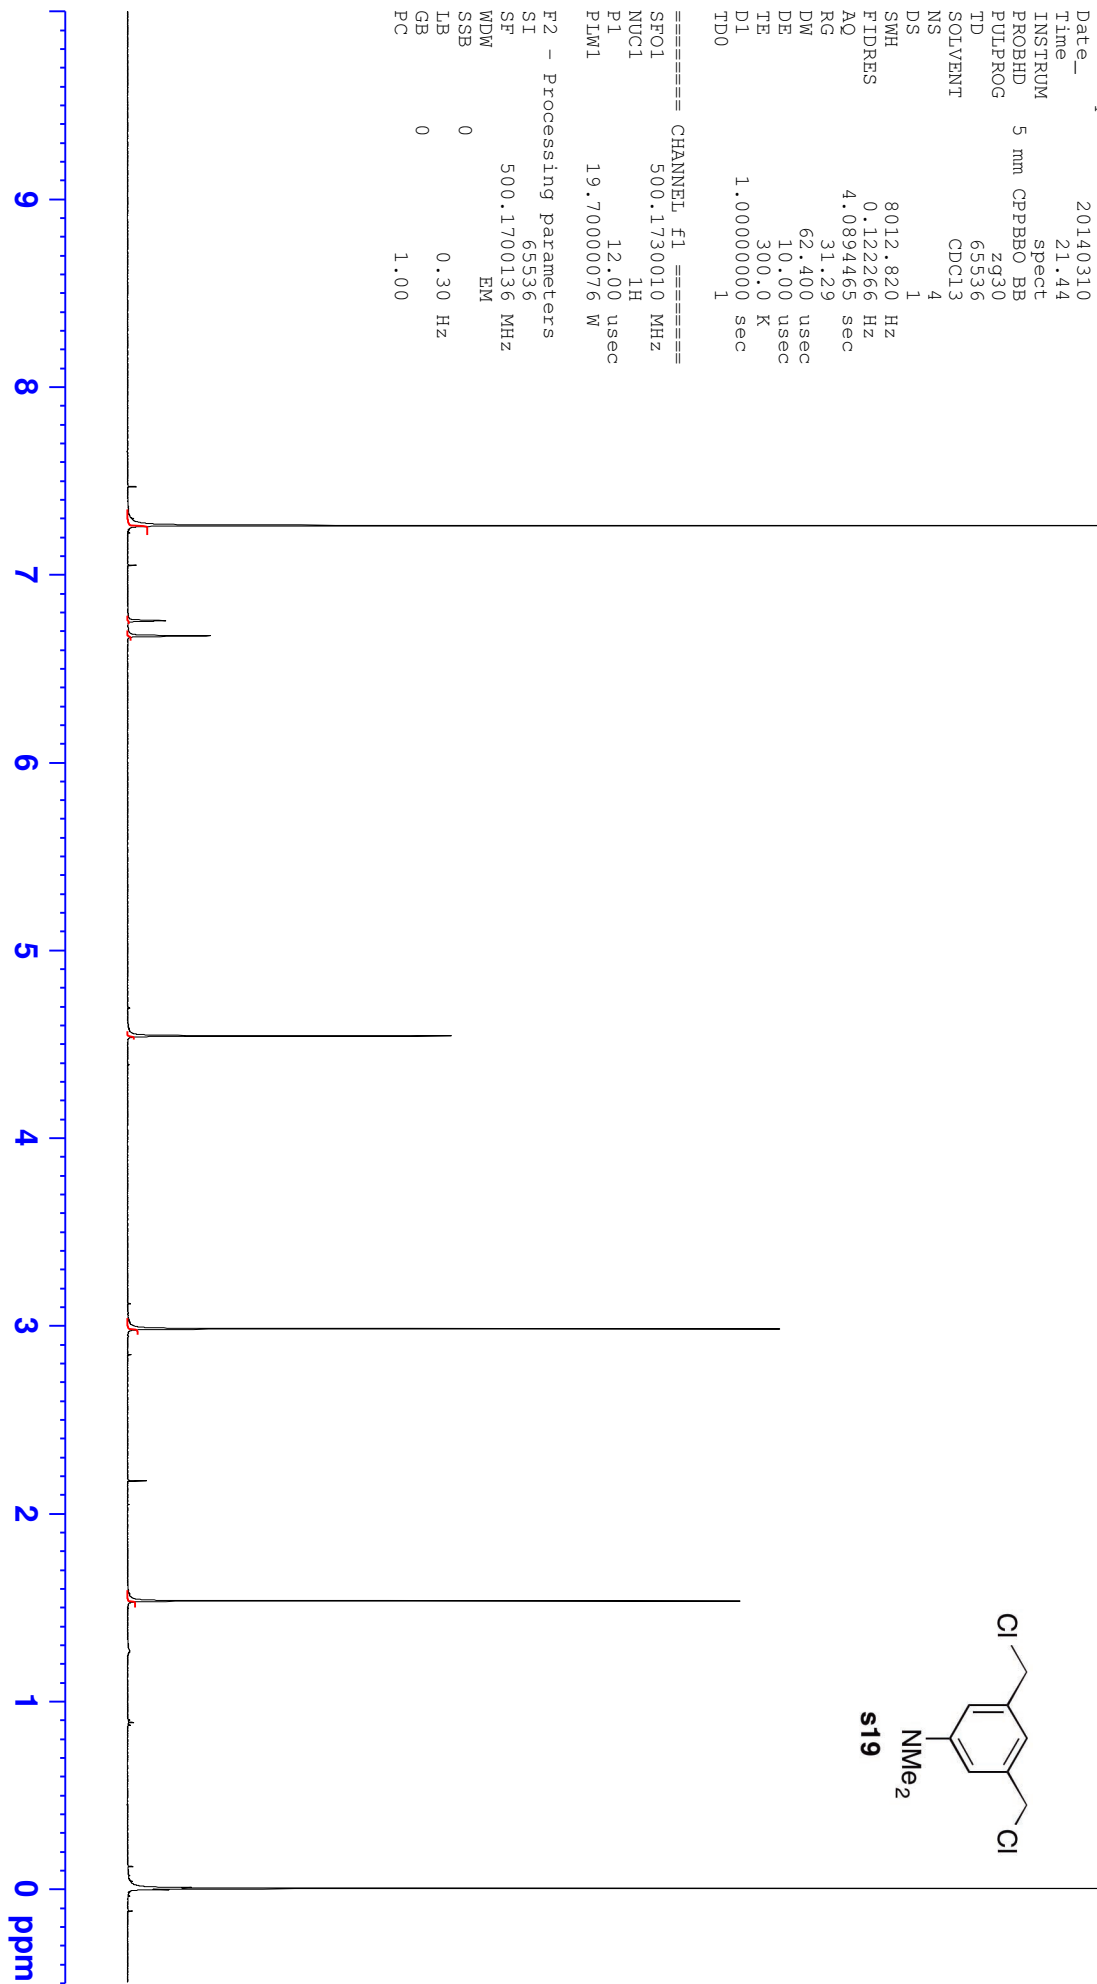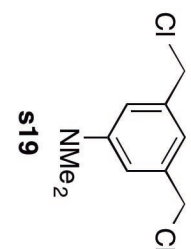

<sup>1</sup>H NMR

Current Data Parameters  
 NAME nkt173(s-14)  
 EXPNO 10  
 PROCNO 1

F2 - Acquisition Parameters  
 Date\_ 20140527  
 Time 14.30

INSTRUM 5 mm QNPBBP  
 PROBHD BB  
 PULPROG zgpg30  
 TD 65536  
 SOLVENT CDCl3  
 NS 39  
 DS 4

SWH 29761.904 Hz  
 FIDRES 0.454131 Hz  
 AQ 1.1010048 sec  
 RG 107.18  
 DW 16.800 usec  
 DE 11.00 usec  
 TE 300.0 K  
 D1 2.00000000 sec  
 D11 0.03000000 sec  
 TD0 1

==== CHANNEL F1 =====  
 SFO1 125.7804227 MHz  
 NUC1 13C  
 P1 10.00 usec  
 PLW1 65.00000000 W

==== CHANNEL F2 =====  
 SFO2 500.1720007 MHz  
 NUC2 1H  
 CPDPRG12 waltz16  
 PCPD2 80.00 usec  
 PLW2 13.50000000 W  
 PLW12 0.30375001 W  
 PLW13 0.19440000 W

F2 - Processing parameters  
 SI 32768  
 SF 125.7678470 MHz  
 WDW EM  
 SSB 0  
 LB 1.00 Hz  
 GB 0  
 PC 1.40

150.997  
 138.762  
 116.556  
 112.352  
 77.287  
 77.033  
 76.779  
 46.640  
 40.467  
 0.010

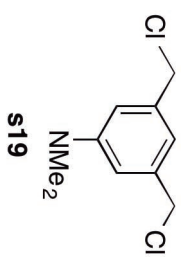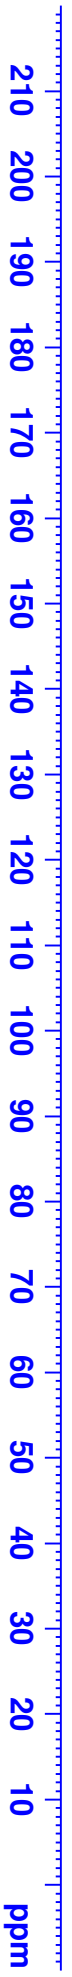

<sup>13</sup>C NMR

Current Data Parameters  
NAME nkt248  
EXPNO 10  
PROCNO 1

F2 - Acquisition Parameters  
Date\_ 20140625  
Time 14.20

INSTRUM 5 mm CPPBBO BB  
PROBHD spect  
PULPROG zg30  
TD 65536  
SOLVENT GDC13  
NS 8  
DS 1  
SWH 8012.820 Hz  
FIDRES 0.122266 Hz  
AQ 4.0894465 sec  
RG 13.62  
DW 62.400 usec  
DE 10.00 usec  
TE 300.0 K  
D1 1.00000000 sec  
TD0 1

==== CHANNEL f1 =====  
SFO1 500.1730010 MHz  
NUC1 1H  
P1 12.00 usec  
PLW1 13.50000000 W

F2 - Processing parameters  
SI 65536  
SF 500.1699936 MHz  
WDW EM  
SSB 0  
LB 0.30 Hz  
GB 0  
PC 1.00

7.297

4.715  
4.701  
4.579  
4.572  
4.564  
4.558  
4.550  
4.543  
4.537  
4.529  
4.521  
4.143  
4.128  
4.114  
4.100  
3.769  
3.653  
3.512

2.068  
2.066  
2.049  
2.045  
1.956  
1.574  
1.552  
1.529  
1.508  
1.312  
1.290  
1.270  
1.267  
1.260  
1.245  
1.239

-0.000

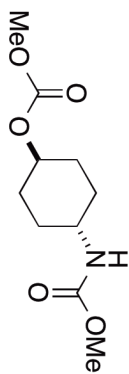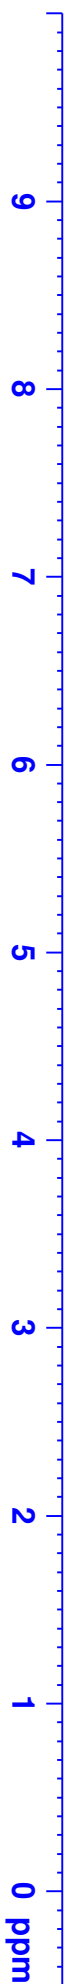

1.000  
1.021  
0.052  
3.130  
2.930  
1.078  
4.317  
2.109  
2.239

Current Data Parameters  
 NAME nk+248  
 EXPNO 20  
 PROCNO 1

F2 - Acquisition Parameters  
 Date\_ 20140625  
 Time 20.52

INSTRUM spect  
 PROBHD 5 mm QNPBB0 BB  
 PULPROG zgpg30  
 TD 65536  
 SOLVENT CDCl3  
 NS 61  
 DS 4

SWH 29761.904 Hz  
 FIDRES 0.454131 Hz  
 AQ 1.1010048 sec  
 RG 189.66  
 DW 16.800 usec  
 DE 11.00 usec  
 TE 300.0 K  
 D1 2.00000000 sec  
 D11 0.03000000 sec  
 TD0 1

==== CHANNEL f1 =====  
 SFO1 125.7804227 MHz  
 NUC1 13C  
 P1 10.00 usec  
 PLW1 65.00000000 W

==== CHANNEL f2 =====  
 SFO2 500.1720007 MHz  
 NUC2 1H  
 CPDPRG12 waltz16  
 PCPD2 80.00 usec  
 PLW2 13.50000000 W  
 PLW12 0.30375001 W  
 PLW13 0.19440000 W

F2 - Processing parameters  
 SI 32768  
 SF 125.7678470 MHz  
 WDW EM  
 SSB 0  
 LB 1.00 Hz  
 GB 0  
 PC 1.40

156.284  
 155.176

77.325  
 77.070  
 76.815  
 75.745

54.556  
 51.938  
 48.745

30.493  
 29.760

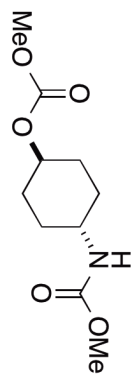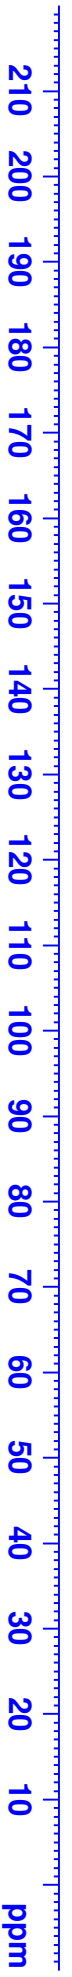



Current Data Parameters  
 NAME nkt252  
 EXPNO 30  
 PROCNO 1

F2 - Acquisition Parameters  
 Date\_ 20140701  
 Time 17.04

INSTRUM 5 mm CPPBBO BB  
 spect  
 PROBHD zq30  
 PULPROG 65536  
 TD 16  
 SOLVENT GDC13  
 NS 2  
 DS 10000.000 Hz  
 SWH 0.152588 Hz  
 FIDRES 3.2767999 sec  
 AQ 31.29  
 RG 50.000 usec  
 DW 10.00 usec  
 DE 300.0 K  
 TE 1.0000000 sec  
 D1 1  
 TD0

==== CHANNEL f1 =====  
 SFO1 500.1730888 MHz  
 NUCL1 1H  
 P1 12.00 usec  
 PLW1 13.5000000 W

F2 - Processing parameters  
 SI 65536  
 SF 500.1700095 MHz  
 WDW EM  
 SSB 0  
 LB 0.30 Hz  
 GB 0  
 PC 1.00

7.266  
 4.585  
 4.577  
 4.568  
 4.564  
 4.555  
 4.546  
 4.542  
 4.533  
 4.525  
 3.767  
 3.478  
 3.439  
 2.793  
 2.785  
 2.777  
 2.771  
 2.764  
 2.756  
 2.750  
 2.742  
 2.734  
 2.459  
 2.074  
 2.068  
 2.063  
 2.054  
 2.047  
 2.039  
 1.933  
 1.909  
 1.514  
 1.507  
 1.488  
 1.486  
 1.481  
 1.467  
 1.459  
 1.441  
 1.433  
 1.290  
 1.282  
 1.262  
 1.257  
 1.241  
 1.235  
 1.215  
 1.208  
 -0.000

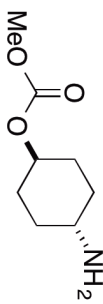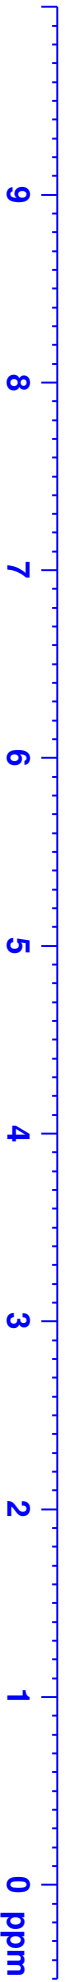

1.000  
 3.029  
 0.185  
 1.122  
 1.740  
 3.636  
 1.970  
 2.520  
 2.244

Current Data Parameters  
 NAME nkt252  
 EXPNO 31  
 PROCNO 1

F2 - Acquisition Parameters  
 Date\_ 20140701  
 Time 17.07

INSTRUM spect  
 PROBHD 5 mm CPPBBO BB  
 PULPROG zgpg30  
 TD 65536  
 SOLVENT CDCl3  
 NS 100  
 DS 4  
 SWH 29761.904 Hz  
 FIDRES 0.454131 Hz  
 AQ 1.1010048 sec  
 RG 189.66  
 DW 16.800 usec  
 DE 11.00 usec  
 TE 300.0 K  
 D1 2.0000000 sec  
 D11 0.0300000 sec  
 TD0 1

==== CHANNEL f1 =====  
 SFO1 125.7804227 MHz  
 NUC1 13C  
 P1 10.00 usec  
 PLW1 65.00000000 W

==== CHANNEL f2 =====  
 SFO2 500.1720007 MHz  
 NUC2 1H  
 CPDPRG12 waltz16  
 PCPD2 80.00 usec  
 PLM2 13.50000000 W  
 PLM12 0.30375001 W  
 PLM13 0.19440000 W

F2 - Processing parameters  
 SI 32768  
 SF 125.7678470 MHz  
 WDW EM  
 SSB 0  
 LB 1.00 Hz  
 GB 0  
 PC 1.40

155.218

77.273  
 77.019  
 76.764  
 76.373

54.541

49.335

33.452

29.924

-0.012

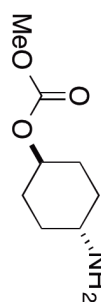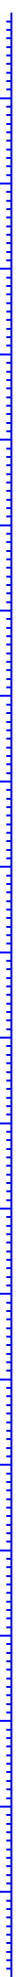

<sup>13</sup>C NMR

210 200 190 180 170 160 150 140 130 120 110 100 90 80 70 60 50 40 30 20 10 ppm

NMR Spectra of Known Compounds (Products)

<sup>1</sup>H NMR

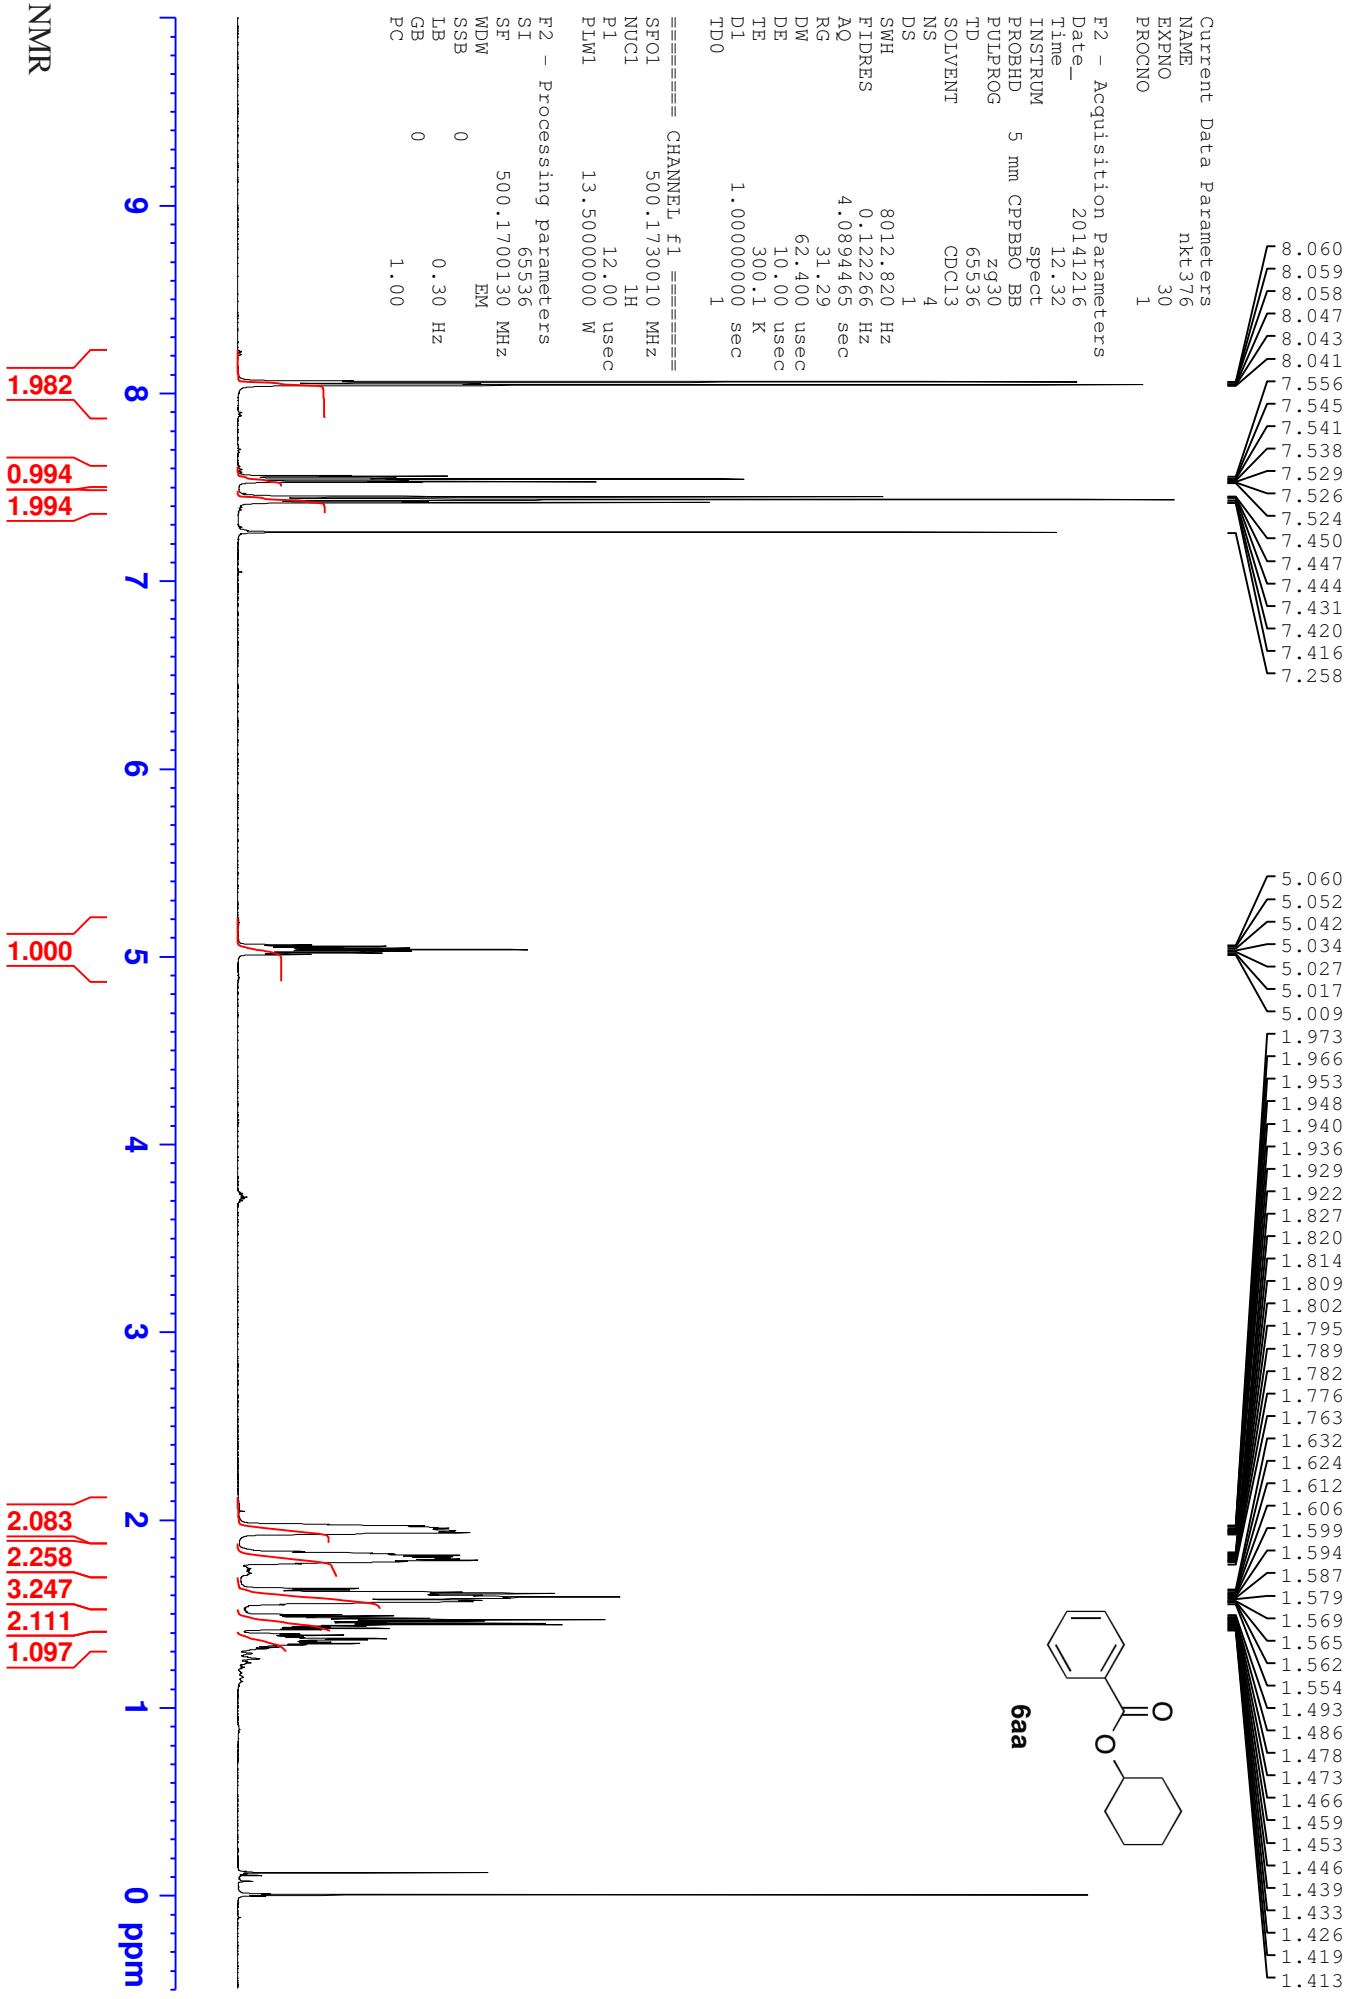

8.090  
8.089  
8.087  
8.074  
8.071  
7.573  
7.570  
7.568  
7.559  
7.556  
7.552  
7.543  
7.541  
7.538  
7.460  
7.458  
7.453  
7.450  
7.447  
7.444  
7.434  
7.422  
7.419  
7.406  
7.403  
7.400  
7.389  
7.386  
7.374  
7.357  
7.354  
7.352  
7.345  
7.340  
7.325  
7.251  
5.369

Current Data Parameters  
 NAME nkt209  
 EXPNO 10  
 PROCNO 1

F2 - Acquisition Parameters  
 Date\_ 20140428  
 Time 17.22

INSTRUM spect  
 PROBHD 5 mm CPPBBO BB  
 PULPROG zg30  
 TD 65536  
 SOLVENT CDCl3  
 NS 4  
 DS 1  
 SWH 8012.820 Hz  
 FIDRES 0.122266 Hz  
 AQ 4.0894465 sec  
 RG 31.29  
 DW 62.400 usec  
 DE 10.00 usec  
 TE 300.0 K  
 D1 1.00000000 sec  
 TD0 1

==== CHANNEL f1 =====  
 SFO1 500.1730010 MHz  
 NUC1 1H  
 P1 12.00 usec  
 PLW1 13.50000000 W

F2 - Processing parameters  
 SI 65536  
 SF 500.1700169 MHz  
 WDW EM  
 SSB 0  
 LB 0.30 Hz  
 GB 0  
 PC 1.00

1.562  
-0.000

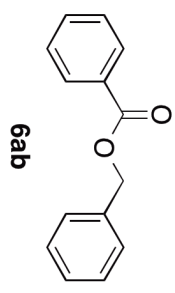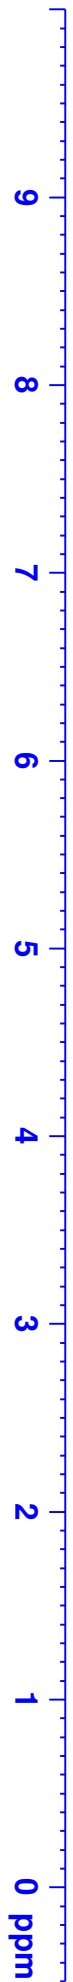

Current Data Parameters  
NAME: 9.543  
EXPNO: 8.040  
PROCNO: 8.037  
Date\_: 20140414  
Time: 21.19  
INSTRUM: spect  
PROBHD: 5 mm CPPBBO BB  
PULPROG: zg30  
TD: 65536  
SOLVENT: CDCl3  
NS: 8  
DS: 1  
SWH: 8012.820 Hz  
FIDRES: 0.122266 Hz  
AQ: 4.0894465 sec  
RG: 31.29  
DW: 62.400 usec  
DE: 10.00 usec  
TE: 300.0 K  
D1: 1.0000000 sec  
TD0: 1

==== CHANNEL f1 =====  
SFO1 500.1730010 MHz  
NUC1 1H  
P1 12.00 usec  
PLM1 19.70000076 W

F2 - Processing parameters  
SI 65536  
SF 500.1700134 MHz  
WDW EM  
SSB 0  
LB 0.30 Hz  
GB 0  
PC 1.00

4.962  
4.953  
4.940  
4.931  
4.918  
4.910

2.168  
2.150  
2.143  
2.138  
2.134  
2.130  
2.126  
2.119  
2.114  
1.985  
1.980  
1.971  
1.966  
1.957  
1.952  
1.756  
1.750  
1.744  
1.740  
1.721  
1.716  
1.585  
1.579  
1.574  
1.568  
1.567  
1.561  
1.557  
1.555  
1.544  
1.538  
1.533  
1.555  
1.548  
1.537  
1.528  
1.523  
1.512  
1.513  
1.511  
1.509  
1.506

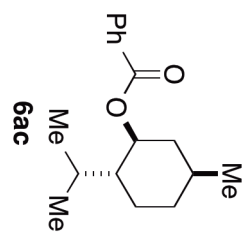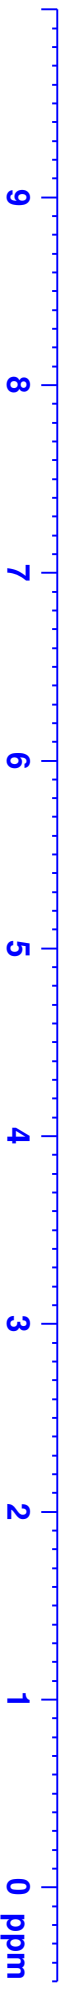

<sup>1</sup>H NMR

Current Data Parameters  
 NAME nkt203  
 EXPNO 10  
 PROCNO 1

7.982  
7.966  
7.966  
7.488  
7.473  
7.459  
7.377  
7.361  
7.346  
7.189

5.356  
5.347  
4.827  
4.817  
4.809  
4.802  
4.794  
4.785  
4.778  
4.771  
4.761  
2.405  
2.390  
1.968  
1.961  
1.942  
1.915  
1.907  
1.863  
1.842  
1.836  
1.772  
1.764  
1.681  
1.658  
1.536  
1.528  
1.508  
1.492  
1.472  
1.466  
1.452  
1.440  
1.422  
1.399  
1.390  
1.316  
1.301  
1.284  
1.274  
1.266  
1.253  
1.207  
1.186  
1.178  
1.170  
1.150  
1.143  
1.135  
1.118  
1.109  
1.082  
1.076

F2 - Acquisition Parameters

Date\_ 20140416  
 Time 20.40  
 INSTRUM spect  
 PROBHD 5 mm CPPBBO BB  
 PULPROG zg30  
 TD 65536  
 SOLVENT GDC13  
 NS 16  
 DS 2  
 SWH 8012.820 Hz  
 FIDRES 0.122266 Hz  
 AQ 4.0894465 sec  
 RG 31.29  
 DW 62.400 usec  
 DE 10.00 usec  
 TE 300.0 K  
 D1 1.00000000 sec  
 TD0 1

==== CHANNEL f1 =====

SFO1 500.1730010 MHz  
 NUCL1 1H  
 P1 12.00 usec  
 PLW1 19.70000076 W

F2 - Processing parameters

SI 65536  
 SF 500.1700481 MHz  
 WDW EM  
 SSB 0  
 LB 0.30 Hz  
 GB 0  
 PC 1.00

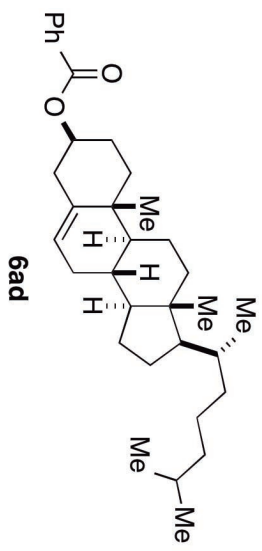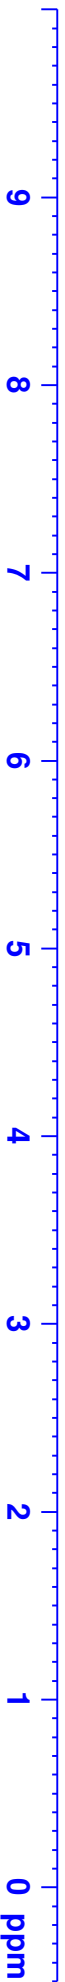

2.035  
0.996  
2.102  
0.984  
1.000  
2.142  
7.209  
7.678  
18.591  
3.141  
6.635  
3.426

<sup>1</sup>H NMR

Current Data Parameters  
 NAME: nke204  
 EXPNO: 8  
 PROCNO: 1

F2 - Acquisition Parameters  
 Date\_: 20140418  
 Time: 17.07  
 INSTRUM: spect  
 PROBHDD: 5 mm CPPBBO BB  
 PULPROG: zg30  
 TD: 65536  
 SOLVENT: GDCL3  
 NS: 8  
 DS: 1  
 SWH: 8012.820 Hz  
 FIDRES: 0.122266 Hz  
 AQ: 4.0894465 sec  
 RG: 31.29  
 DW: 62.400 usec  
 DE: 10.00 usec  
 TE: 300.0 K  
 D1: 1.00000000 sec  
 TD0: 1

==== CHANNEL f1 =====  
 SFO1 500.1730010 MHz  
 NUC1 1H  
 P1 12.00 usec  
 PLW1 19.70000076 W

F2 - Processing parameters  
 SI 65536  
 SF 500.1700135 MHz  
 WDW EM  
 SSB 0  
 LB 0.30 Hz  
 GB 0  
 PC 1.00

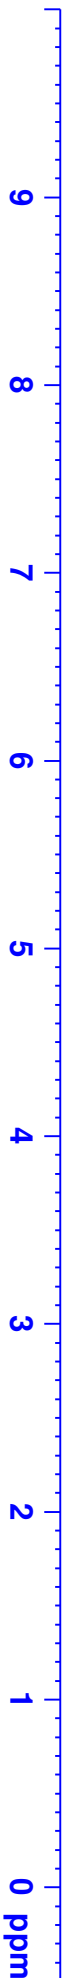

2.019

1.114  
2.044

1.000

1.110

1.111

1.226

1.010

0.444

1.246

1.158

1.419

3.787

6.104

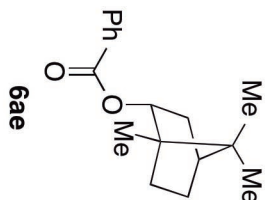

Current Data Parameters  
 Name: YK607  
 EXPNO: 2  
 PROCNO: 1

F2 - Acquisition Parameters

Date\_: 20131112  
 Time: 15.52  
 INSTRUM: spect  
 PROBHD: 5 mm CPPBBO BB  
 PULPROG: zg30  
 TD: 65536  
 SOLVENT: CDCl3  
 NS: 1  
 DS: 0  
 SWH: 10000.000 Hz  
 FIDRES: 0.152588 Hz  
 AQ: 3.2767999 sec  
 RG: 31.29  
 DW: 50.000 usec  
 DE: 10.00 usec  
 TE: 300.0 K  
 D1: 1.00000000 sec  
 TD0: 1

==== CHANNEL f1 =====  
 SFO1 500.1730888 MHz  
 NUC1 1H  
 P1 12.00 usec  
 PLW1 19.70000076 W

F2 - Processing parameters  
 SI 65536  
 SF 500.1700133 MHz  
 WDW EM  
 SSB 0  
 LB 0.30 Hz  
 GB 0  
 PC 1.00

7.559  
7.544  
7.541  
7.532  
7.529  
7.527  
7.448  
7.445  
7.432  
7.420  
7.417  
7.258  
  
4.440  
4.426  
4.423  
4.421  
4.407  
  
1.553  
1.155  
1.138  
1.121  
  
0.087  
-0.000

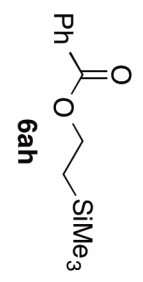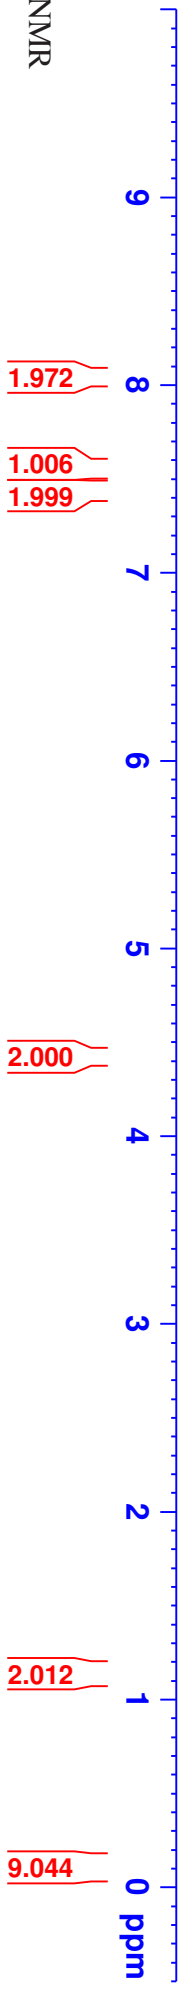



Current Data Parameters  
 Name: nkt116  
 ExpNo: 100  
 ProcNo: 1

F2 - Acquisition Parameters

Date\_: 20131210  
 Time: 14.58  
 INSTRUM: spect  
 PROBHD: 5 mm CPPBBO BB  
 PULPROG: zg30  
 TD: 65536  
 SOLVENT: CDCl3  
 NS: 4  
 DS: 1  
 SWH: 8012.820 Hz  
 FIDRES: 0.122266 Hz  
 AO: 4.0894465 sec  
 RG: 31.29  
 DW: 62.400 usec  
 DE: 10.00 usec  
 TE: 300.0 K  
 D1: 1.0000000 sec  
 TD0: 1

==== CHANNEL f1 =====  
 SFO1: 500.1730010 MHz  
 NUC1: 1H  
 P1: 12.00 usec  
 PLW1: 19.70000076 W

F2 - Processing parameters  
 SI: 65536  
 SF: 500.1700105 MHz  
 WDW: EM  
 SSB: 0  
 LB: 0.30 Hz  
 GB: 0  
 PC: 1.00

9.067  
 8.063  
 8.060  
 7.591  
 7.576  
 7.564  
 7.561  
 7.559  
 7.468  
 7.465  
 7.453  
 7.440  
 7.437  
 7.262  
 4.955  
 4.951  
 4.947  
 3.475  
 2.579  
 2.565  
 2.551  
 2.536  
 1.084  
 1.070  
 1.056  
 -0.000

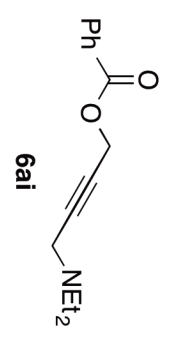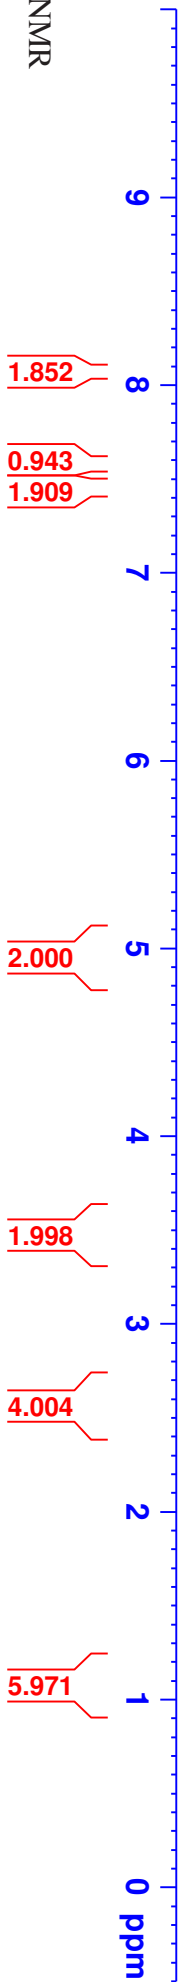

Current Data Parameters  
 Name: nke205  
 EXPNO: 1  
 PROCNO: 1

F2 - Acquisition Parameters  
 Date\_: 20140418  
 Time: 17.13

INSTRUM: spect  
 PROBHD: 5 mm CPPBBO BB  
 PULPROG: zg30  
 TD: 65536  
 SOLVENT: CDCl3  
 NS: 8  
 DS: 1  
 SWH: 8012.820 Hz  
 FIDRES: 0.122266 Hz  
 AO: 4.0894465 sec  
 RG: 31.29  
 DW: 62.400 usec  
 DE: 10.00 usec  
 TE: 300.0 K  
 D1: 1.00000000 sec  
 TD0: 1

==== CHANNEL f1 =====  
 SFO1: 500.1730010 MHz  
 NUC1: 1H  
 P1: 12.00 usec  
 PLW1: 19.70000076 W

F2 - Processing parameters  
 SI: 65536  
 SF: 500.1700172 MHz  
 WDW: EM  
 SSB: 0  
 LB: 0.30 Hz  
 GB: 0  
 PC: 1.00

7.215  
7.230  
7.245  
7.251  
7.335  
7.349  
7.352  
7.370  
7.373  
7.377  
7.382  
7.385  
7.389  
7.399  
7.401  
7.404  
7.407  
7.439  
7.453  
5.342  
3.890  
2.606  
1.552  
1.554  
-0.000

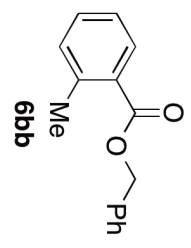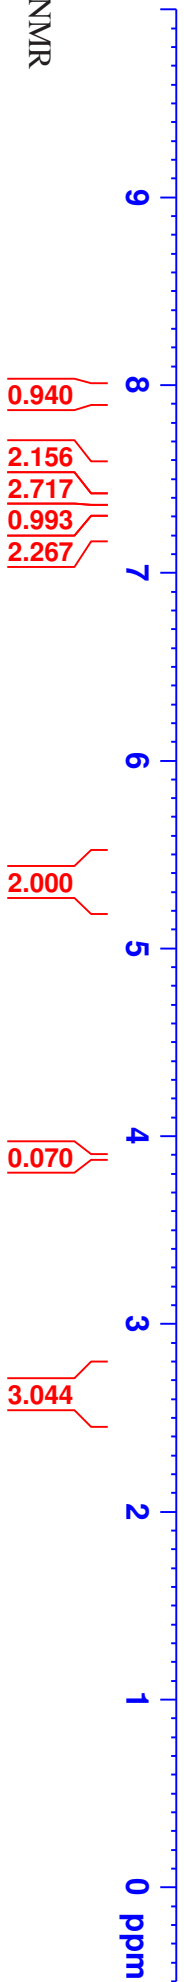

Current Data Parameters  
 NAME: gcf  
 EXPNO: 1  
 PROCNO: 1

F2 - Acquisition Parameters  
 Date\_: 20140304  
 Time: 18.31

INSTRUM: spect  
 PROBHD: 5 mm CPPBBO BB  
 PULPROG: zg30  
 TD: 65536  
 SOLVENT: CDCl3  
 NS: 8  
 DS: 1  
 SWH: 8012.820 Hz  
 FIDRES: 0.122266 Hz  
 AQ: 4.0894465 sec  
 RG: 31.29  
 DW: 62.400 usec  
 DE: 10.00 usec  
 TE: 300.0 K  
 D1: 1.00000000 sec  
 TD0: 1

==== CHANNEL f1 =====  
 SFO1 500.1730010 MHz  
 NUC1 1H  
 P1 12.00 usec  
 PLW1 19.70000076 W

F2 - Processing parameters  
 SI 65536  
 SF 500.1700137 MHz  
 WDW EM  
 SSB 0  
 LB 0.30 Hz  
 GB 0  
 PC 1.00

7.583  
7.579  
7.567  
7.564  
7.552  
7.548  
7.259  
7.245  
7.229  
7.177  
7.167  
7.163  
7.152  
7.112  
7.096  
7.045  
7.030  
  
5.266  
5.238  
5.216  
5.188  
  
3.844  
3.830  
3.816  
3.801  
  
2.464  
2.450  
1.893  
1.879  
1.866  
1.852  
1.839  
1.825  
1.812  
1.552  
1.538  
  
0.908  
0.895  
  
-0.000

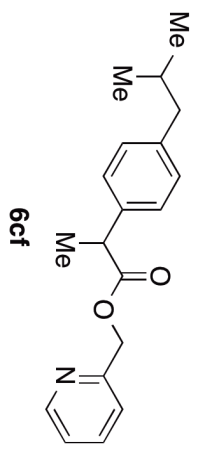

<sup>1</sup>H NMR

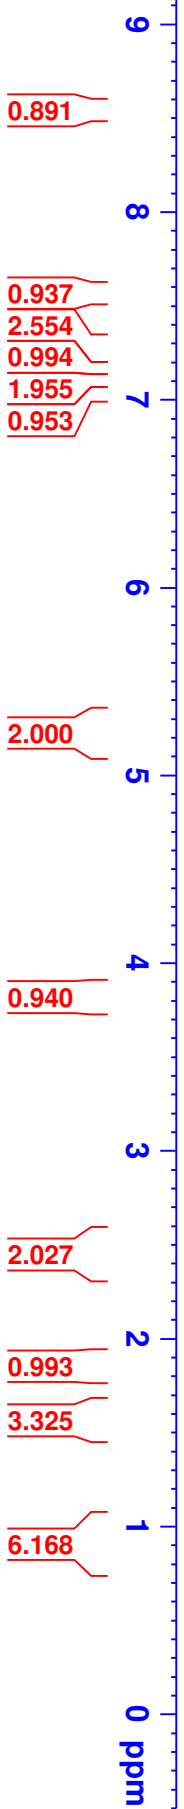

Current Data Parameters  
NAME YKLE531  
EXPNO 10  
PROCNO 1

F2 - Acquisition Parameters  
Date\_ 20130830  
Time 19.40

INSTRUM 5 mm CPPBBO BB  
PROBHD spect  
PULPROG zg30  
TD 65536  
SOLVENT GDCL3  
NS 1  
DS 0  
SWH 10000.000 Hz  
FIDRES 0.152588 Hz  
AQ 3.2767999 sec  
RG 23.8  
DW 50.000 usec  
DE 10.00 usec  
TE 300.0 K  
D1 1.00000000 sec  
TD0 1

==== CHANNEL f1 =====  
SFO1 500.1730888 MHz  
NUC1 1H  
P1 12.00 usec  
PLW1 19.70000076 W

F2 - Processing parameters  
SI 65536  
SF 500.1700161 MHz  
WDW EM  
SSB 0  
LB 0.30 Hz  
GB 0  
PC 1.00

7.289  
7.273  
7.259  
7.252  
7.202  
7.187

2.914  
2.899  
2.883  
2.551  
2.536  
2.534  
2.519  
2.143  
2.074  
2.068

1.649

0.071  
-0.000

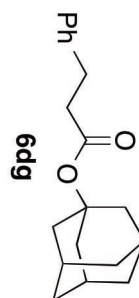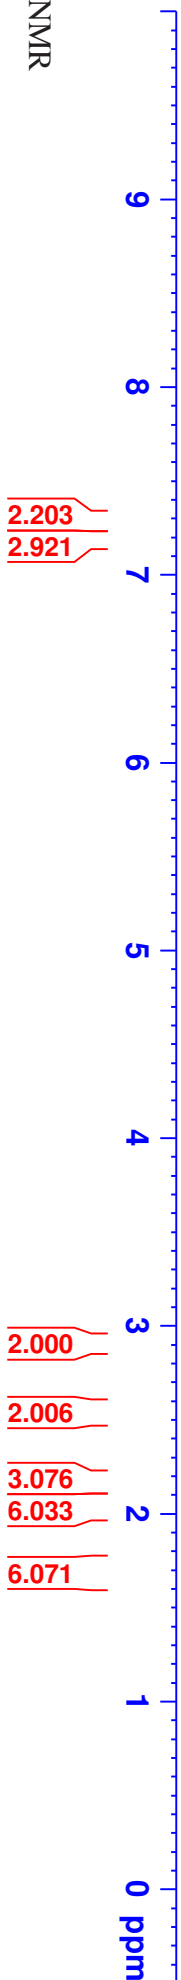

Current Data Parameters  
NAME YK584-iso  
EXPNO 10  
PROCNO 1

8.146  
8.144  
8.143

7.381  
7.377  
7.373  
7.367  
7.359  
7.354  
7.255

5.207

1.549  
1.544

-0.000

F2 - Acquisition Parameters

Date\_ 20140109  
Time 21.14  
INSTRUM spect  
PROBHD 5 mm CPPBBO BB  
PULPROG zg30  
TD 65536  
SOLVENT GDCl3  
NS 1  
DS 0  
SWH 10000.000 Hz  
FIDRES 0.152588 Hz  
AQ 3.2767999 sec  
RG 31.29  
DW 50.000 usec  
DE 10.00 usec  
TE 300.0 K  
D1 1.0000000 sec  
TD0 1

==== CHANNEL f1 =====

SFO1 500.1730888 MHz  
NUC1 1H  
P1 12.00 usec  
PLW1 19.7000076 W

F2 - Processing parameters

SI 65536  
SF 500.1700139 MHz  
WDW EM  
SSB 0  
LB 0.30 Hz  
GB 0  
PC 1.00

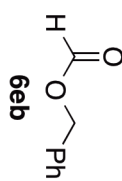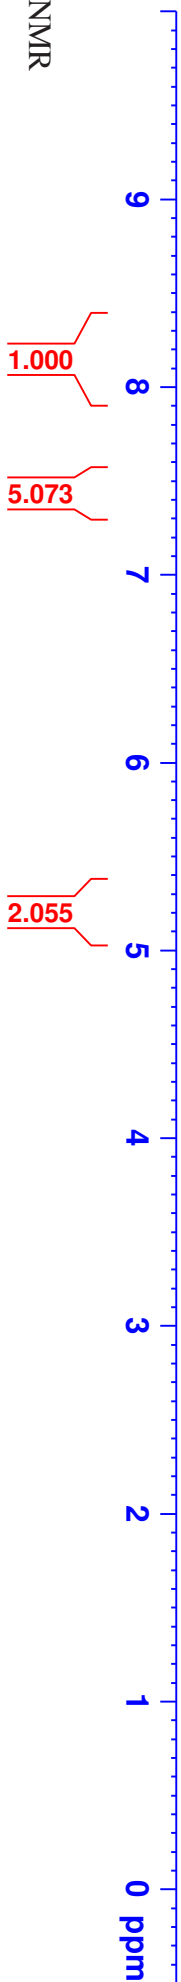

Current Data Parameters  
 NAME val onbu  
 EXPNO 2  
 PROCNO 1

F2 - Acquisition Parameters  
 Date\_ 20130912  
 Time 15.13

INSTRUM 5 mm CFPBBO BB  
 SPECT spect  
 PROBHD zq30  
 PULPROG 65536  
 TD 65536  
 SOLVENT GDC13  
 NS 1  
 DS 0  
 SWH 8012.820 Hz  
 FIDRES 0.122266 Hz  
 AQ 4.0894465 sec  
 RG 31.29  
 DW 62.400 usec  
 DE 10.00 usec  
 TE 300.0 K  
 D1 1.00000000 sec  
 TD0 1

==== CHANNEL f1 =====  
 SFO1 500.1730010 MHz  
 NUC1 1H  
 P1 12.00 usec  
 PLW1 19.70000076 W

F2 - Processing parameters  
 SI 65536  
 SF 500.1700127 MHz  
 WDW EM  
 SSB 0  
 LB 0.30 Hz  
 GB 0  
 PC 1.00

7.367  
7.359  
7.343  
7.334  
7.327  
7.317  
7.259

5.270  
5.253  
5.111

4.307  
4.298  
4.289  
4.280  
4.155  
4.143  
4.134  
4.121  
4.113

2.184  
2.171  
2.161  
2.146  
1.640  
1.624  
1.611  
1.548  
1.404  
1.389  
1.374  
1.359  
0.977  
0.963  
0.947  
0.933  
0.918  
0.900  
0.886

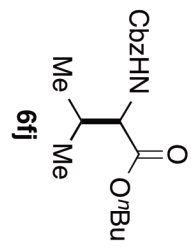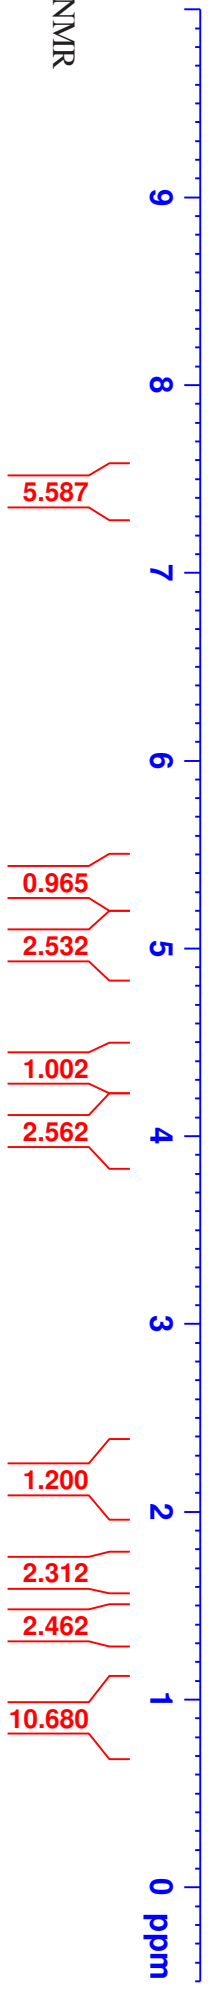

Current Data Parameters  
 NAME benzyl acrylate  
 EXPNO 20  
 PROCNO 1

F2 - Acquisition Parameters

Date\_ 20150106  
 Time 20.21  
 INSTRUM spect  
 PROBHD 5 mm CPPBBO BB  
 PULPROG zg30  
 TD 65536  
 SOLVENT GDC13  
 NS 4  
 DS 1  
 SWH 8012.820 Hz  
 FIDRES 0.122266 Hz  
 AQ 4.0894465 sec  
 RG 31.29  
 DW 62.400 usec  
 DE 10.00 usec  
 TE 300.1 K  
 D1 1.00000000 sec  
 TD0 1

==== CHANNEL f1 =====  
 SFO1 500.1730010 MHz  
 NUC1 1H  
 P1 12.00 usec  
 PLW1 13.50000000 W

F2 - Processing parameters  
 SI 65536  
 SF 500.1700146 MHz  
 WDW EM  
 SSB 0  
 LB 0.30 Hz  
 GB 0  
 PC 1.00

7.380  
7.374  
7.370  
7.358  
7.354  
7.353  
7.345  
7.340  
7.336  
7.332  
7.328  
7.324  
7.321  
7.318  
7.255  
6.468  
6.466  
6.434  
6.431  
6.197  
6.177  
6.163  
6.142  
5.860  
5.857  
5.839  
5.837  
5.204  
  
1.568  
1.562  
1.559  
  
0.071  
-0.000

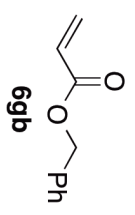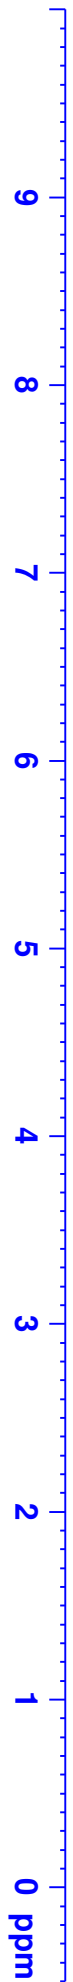

4.784  
0.976  
0.943  
0.989  
2.000  
0.226  
0.005  
0.025

Current Data Parameters  
 NAME yfc620-iso  
 EXPNO 10  
 PROCNO 1

F2 - Acquisition Parameters

Date\_ 20140109  
 Time 21.22  
 INSTRUM spect  
 PROBHD 5 mm CPPBBO BB  
 PULPROG zg30  
 TD 65536  
 SOLVENT GDC13  
 NS 1  
 DS 0  
 SWH 10000.000 Hz  
 FIDRES 0.152588 Hz  
 AQ 3.2767999 sec  
 RG 31.29  
 DW 50.000 usec  
 DE 10.00 usec  
 TE 300.0 K  
 D1 1.00000000 sec  
 TD0 1

==== CHANNEL f1 =====  
 SFO1 500.1730888 MHz  
 NUC1 1H  
 P1 12.00 usec  
 PLW1 19.70000076 W

F2 - Processing parameters  
 SI 65536  
 SF 500.1700139 MHz  
 WDW EM  
 SSB 0  
 LB 0.30 Hz  
 GB 0  
 PC 1.00

7.387  
 7.376  
 7.371  
 7.367  
 7.365  
 7.360  
 7.351  
 7.349  
 7.339  
 7.334  
 7.333  
 7.329  
 7.326  
 7.322  
 7.255  
 6.161  
 6.159  
 6.158  
 6.156  
 5.587  
 5.584  
 5.581  
 5.197

1.974  
 1.972  
 1.971  
 1.969

-0.000

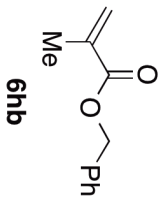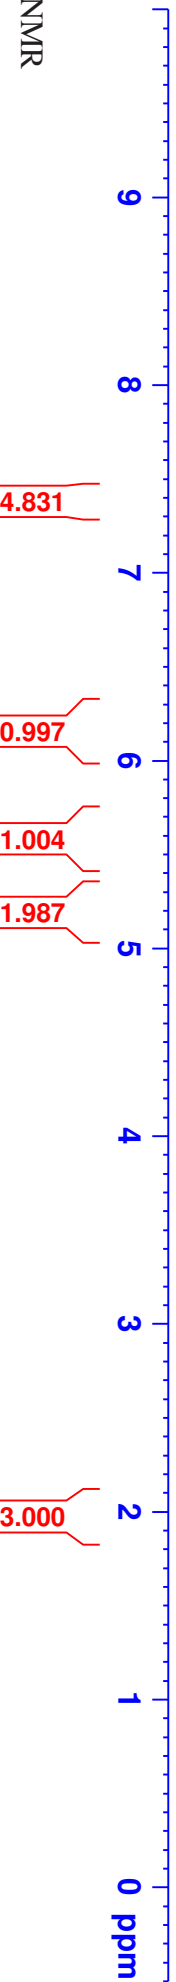



Current Data Parameters  
NAME YK500-2cu  
EXPNO 10  
PROCNO 1

F2 - Acquisition Parameters  
Date\_ 20130819  
Time 17.24

INSTRUM 5 mm CPPBBO BB  
PROBHD zg30  
PULPROG 65536  
TD 65536  
SOLVENT GDCL3  
NS 1  
DS 0  
SWH 10000.000 Hz  
FIDRES 0.152588 Hz  
AQ 3.2767999 sec  
RG 31.29  
DW 50.000 usec  
DE 10.00 usec  
TE 300.0 K  
D1 1.00000000 sec  
TD0 1

==== CHANNEL f1 =====  
SFO1 500.1730888 MHz  
NUC1 1H  
P1 12.00 usec  
PLW1 19.70000076 W

F2 - Processing parameters  
SI 65536  
SF 500.1700128 MHz  
WDW EM  
SSB 0  
LB 0.30 Hz  
GB 0  
PC 1.00

7.382  
7.381  
7.377  
7.376  
7.370  
7.363  
7.359  
7.355  
7.259

5.210

4.445  
4.431

1.711  
1.697  
1.565

-0.000

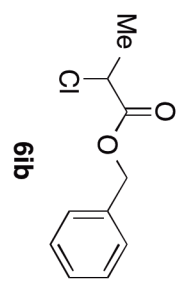

<sup>1</sup>H NMR

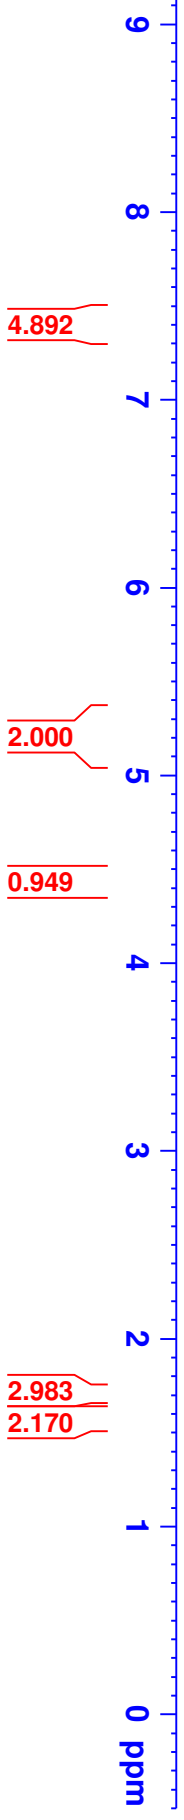

Current Data Parameters  
NAME nkt224  
EXPNO 20  
PROCNO 1

F2 - Acquisition Parameters

Date\_ 20140513  
Time 13:57  
INSTRUM spect  
PROBHD 5 mm CPPBBO BB  
PULPROG zg30  
TD 65536  
SOLVENT GDCl3  
NS 8  
DS 1  
SWH 8012.820 Hz  
FIDRES 0.122266 Hz  
AQ 4.0894465 sec  
RG 31.29  
DW 62.400 usec  
DE 10.00 usec  
TE 300.0 K  
D1 1.0000000 sec  
TD0 1

==== CHANNEL f1 =====  
SFO1 500.1730010 MHz  
NUC1 1H  
P1 12.00 usec  
PLW1 13.5000000 W

F2 - Processing parameters  
SI 65536  
SF 500.1700098 MHz  
WDW EM  
SSB 0  
LB 0.30 Hz  
GB 0  
PC 1.00

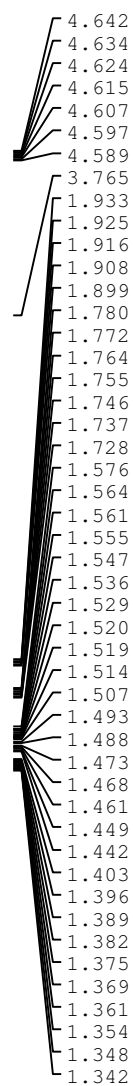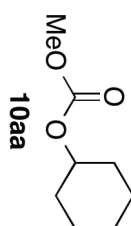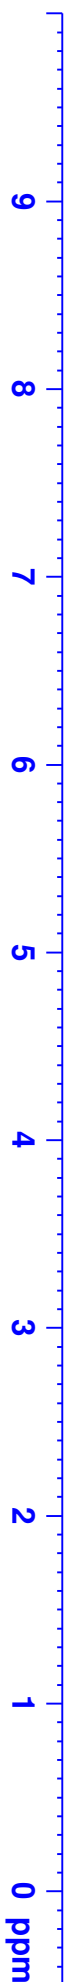

<sup>1</sup>H NMR

Current Data Parameters  
 NAME nkt221  
 EXPNO 10  
 PROCNO 1

F2 - Acquisition Parameters  
 Date\_ 20140509  
 Time 19.23

INSTRUM 5 mm CPPBBO BB  
 PROBHD spect  
 PULPROG zg30  
 TD 65536  
 SOLVENT GDCl3  
 NS 8  
 DS 1  
 SWH 8012.820 Hz  
 FIDRES 0.122266 Hz  
 AQ 4.0894465 sec  
 RG 31.29  
 DW 62.400 usec  
 DE 10.00 usec  
 TE 300.0 K  
 D1 1.00000000 sec  
 TD0 1

==== CHANNEL f1 =====  
 SFO1 500.1730010 MHz  
 NUC1 1H  
 P1 12.00 usec  
 PLW1 13.50000000 W

F2 - Processing parameters  
 SI 65536  
 SF 500.1700132 MHz  
 WDW EM  
 SSB 0  
 LB 0.30 Hz  
 GB 0  
 PC 1.00

7.392  
7.382  
7.380  
7.376  
7.369  
7.367  
7.363  
7.356  
7.354  
7.351  
7.346  
7.341  
7.258

5.166

4.143  
4.128  
4.114  
4.100  
3.797

2.043

1.542  
1.273  
1.258  
1.244

-0.000

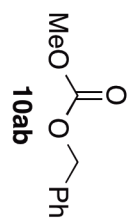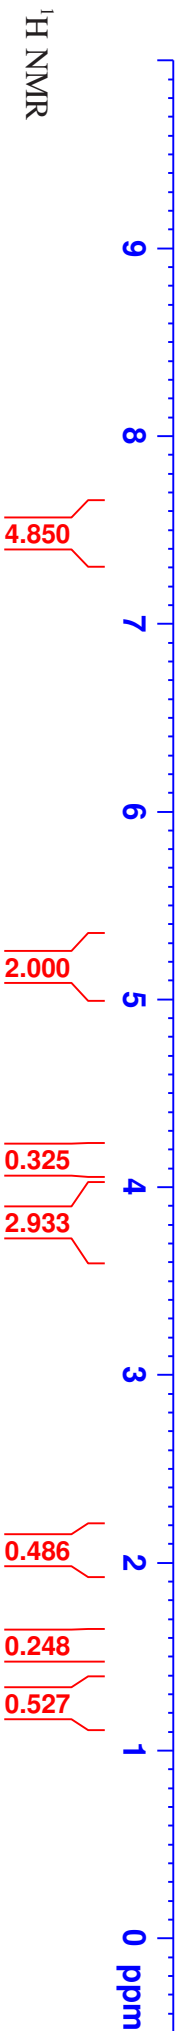

Current Data Parameters  
NAME nkt233tm  
EXPNO 10  
PROCNO 1

F2 - Acquisition Parameters  
Date\_ 20140526  
Time 13.10

INSTRUM spect  
PROBHD 5 mm CPPBBO BB  
PULPROG zg30  
TD 65536  
SOLVENT CDCl3

DS 4  
SWH 8012.820 Hz  
FIDRES 0.122266 Hz  
AQ 4.0894465 sec  
RG 31.29

DW 62.400 usec  
DE 10.00 usec  
TE 300.0 K  
D1 1.0000000 sec  
TD0 1

==== CHANNEL f1 =====  
SFO1 500.1730010 MHz  
NUC1 1H  
P1 12.00 usec  
PLW1 13.5000000 W

F2 - Processing parameters  
SI 65536  
SF 500.1700117 MHz  
WDW EM  
SSB 0  
LB 0.30 Hz  
GB 0  
PC 1.00

7.262  
3.701  
2.194  
2.117  
2.111  
1.664  
1.659  
1.551  
-0.000

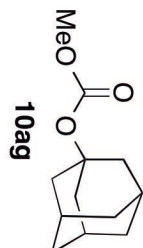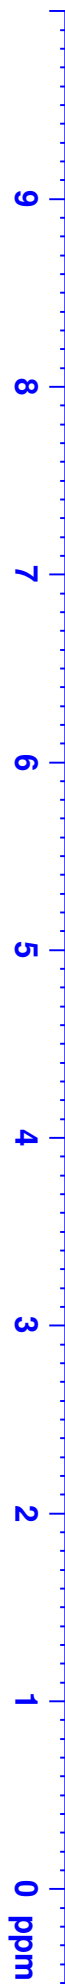

<sup>1</sup>H NMR

Current Data Parameters  
NAME nkt222  
EXPNO 10  
PROCNO 1

F2 - Acquisition Parameters  
Date\_ 20140513  
Time 14.05

INSTRUM 5 mm CPPBBO BB  
PROBHD z930  
PULPROG 65536  
TD 8  
SOLVENT GDC13  
NS 1  
DS 1  
SWH 8012.820 Hz  
FIDRES 0.122266 Hz  
AQ 4.0894465 sec  
RG 31.29  
DW 62.400 usec  
DE 10.00 usec  
TE 300.0 K  
D1 1.00000000 sec  
TD0 1

==== CHANNEL f1 =====  
SFO1 500.1730010 MHz  
NUC1 1H  
P1 12.00 usec  
PLW1 13.50000000 W

F2 - Processing parameters  
SI 65536  
SF 500.1700091 MHz  
WDW EM  
SSB 0  
LB 0.30 Hz  
GB 0  
PC 1.00

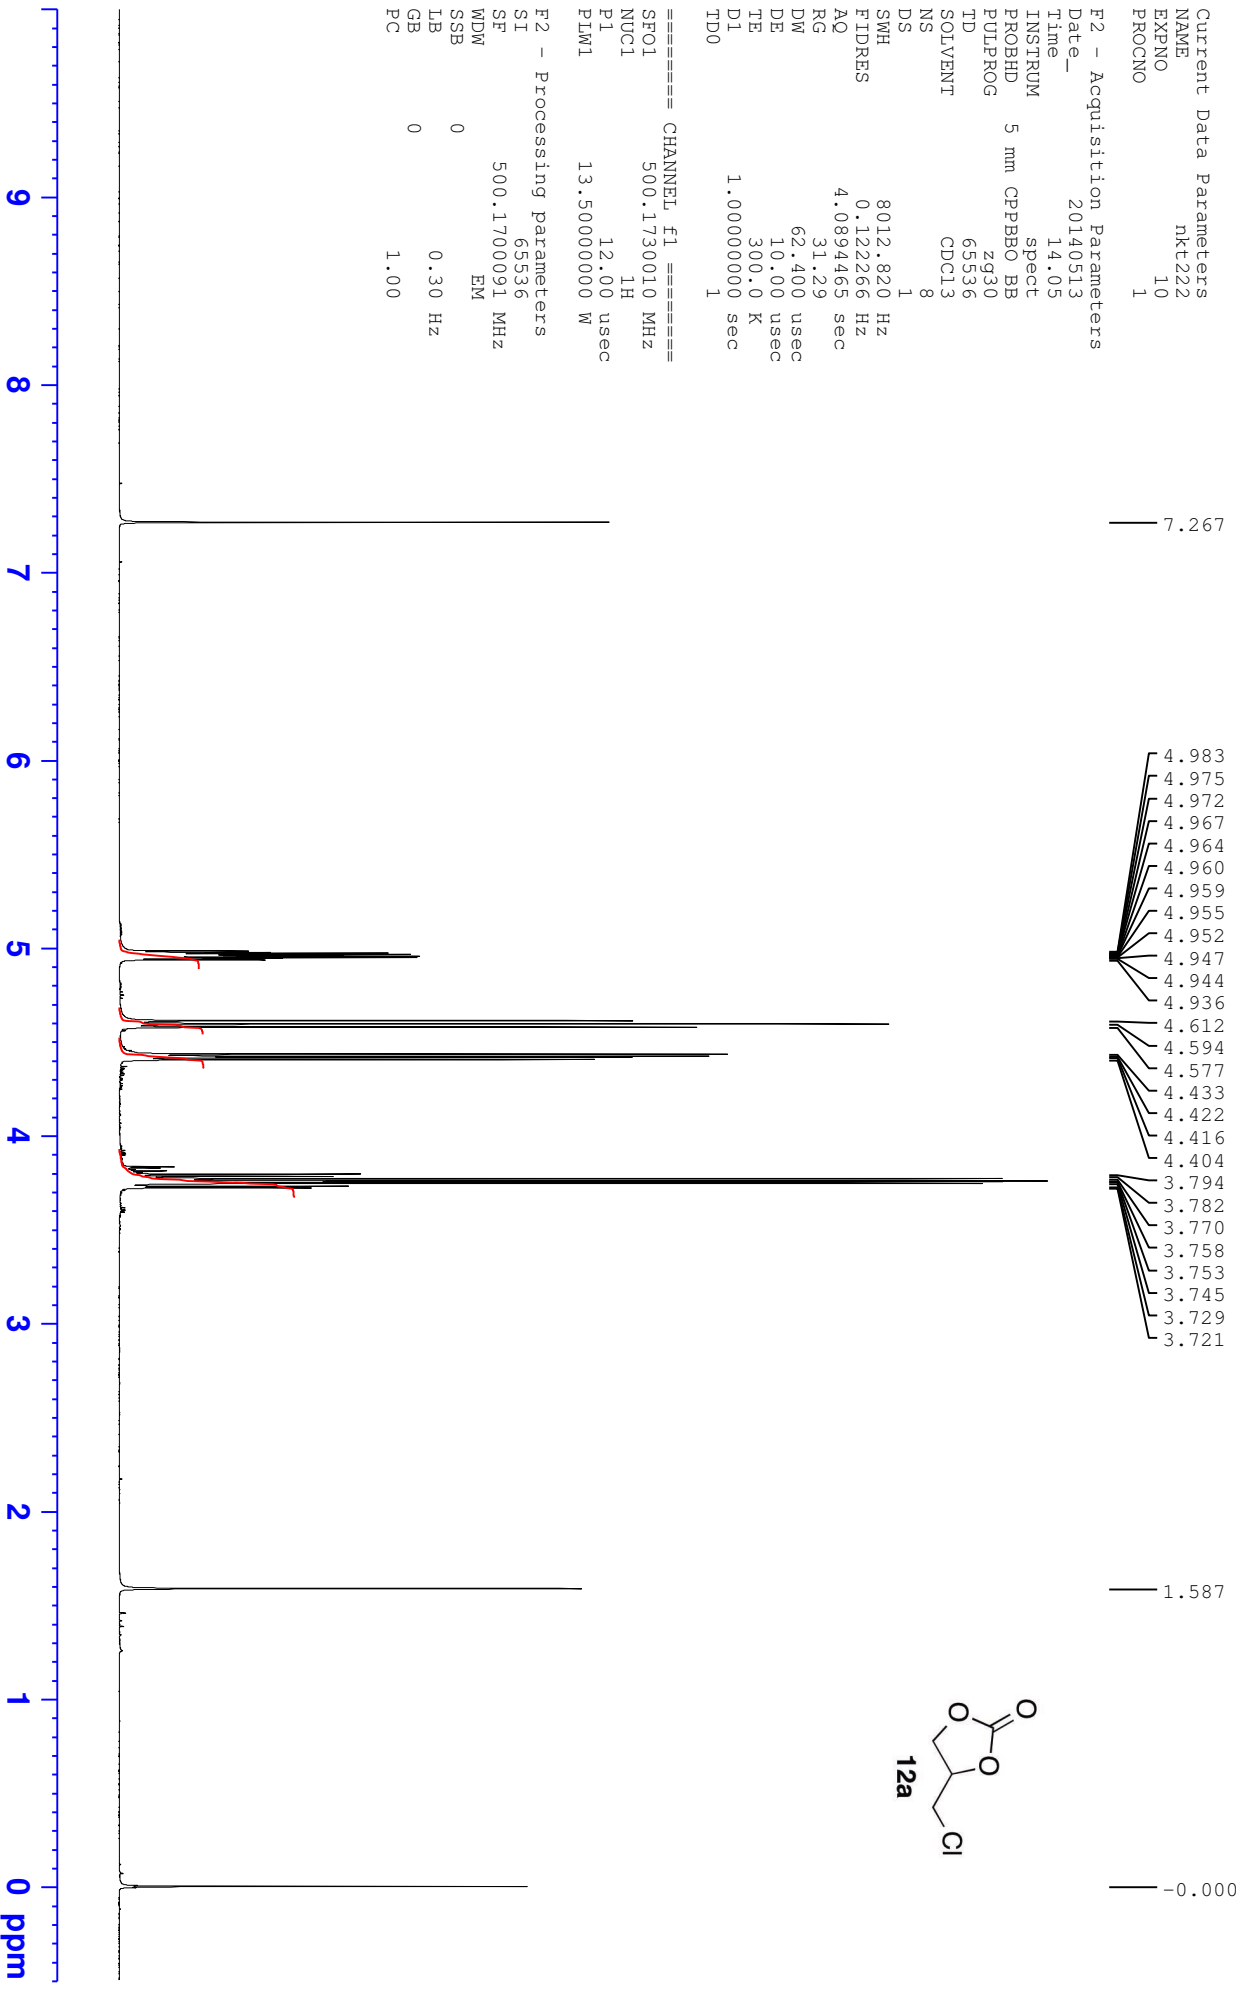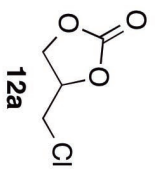

<sup>1</sup>H NMR

Current Data Parameters  
 NAME nkt318  
 EXPNO 10  
 PROCNO 1

F2 - Acquisition Parameters

Date\_ 20140911  
 Time 10.52  
 INSTRUM spect  
 PROBD 5 mm CPPBBO BB  
 PULPROG zg30  
 TD 65536  
 SOLVENT GDC13  
 NS 16  
 DS 2  
 SWH 10000.000 Hz  
 FIDRES 0.152588 Hz  
 AQ 3.2767999 sec  
 RG 31.29  
 DW 50.000 usec  
 DE 10.00 usec  
 TE 300.0 K  
 D1 1.00000000 sec  
 TD0 1

==== CHANNEL f1 =====  
 SFO1 500.1730888 MHz  
 NUC1 1H  
 P1 12.00 usec  
 PLW1 13.50000000 W

F2 - Processing parameters  
 SI 65536  
 SF 500.1700084 MHz  
 WDW EM  
 SSB 0  
 LB 0.30 Hz  
 GB 0  
 PC 1.00

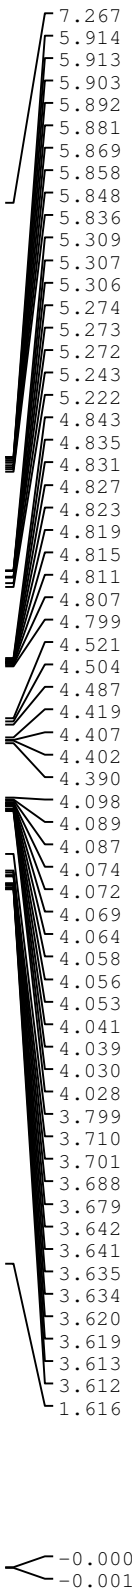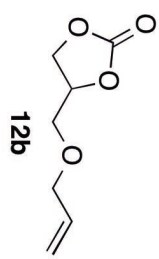

1.000  
2.078  
1.015  
1.074  
1.082  
2.142  
2.181

<sup>1</sup>H NMR

Current Data Parameters

|        |        |
|--------|--------|
| NAME   | nkt322 |
| EXPNO  | 10     |
| PROCNO | 1      |

F2 - Acquisition Parameters

|         |                |
|---------|----------------|
| Date_   | 20141129       |
| Time    | 17.37          |
| INSTRUM | spect          |
| PROBHD  | 5 mm CPPBBO BB |
| PULPROG | zg30           |
| TD      | 65536          |
| SOLVENT | CDCl3          |
| NS      | 4              |
| DS      | 1              |
| SWH     | 8012.820 Hz    |
| FIDRES  | 0.122266 Hz    |
| AO      | 4.0894465 sec  |
| RG      | 31.29          |
| DW      | 62.400 usec    |
| DE      | 10.00 usec     |
| TE      | 300.2 K        |
| D1      | 1.00000000 sec |
| TD0     | 1              |

==== CHANNEL f1 =====

|      |                 |
|------|-----------------|
| SFO1 | 500.1730010 MHz |
| NUC1 | 1H              |
| P1   | 12.00 usec      |
| PLW1 | 13.50000000 W   |

F2 - Processing parameters

|     |                 |
|-----|-----------------|
| SI  | 65536           |
| SF  | 500.1700127 MHz |
| WDW | EM              |
| SSB | 0               |
| LB  | 0.30 Hz         |
| GB  | 0               |
| PC  | 1.00            |

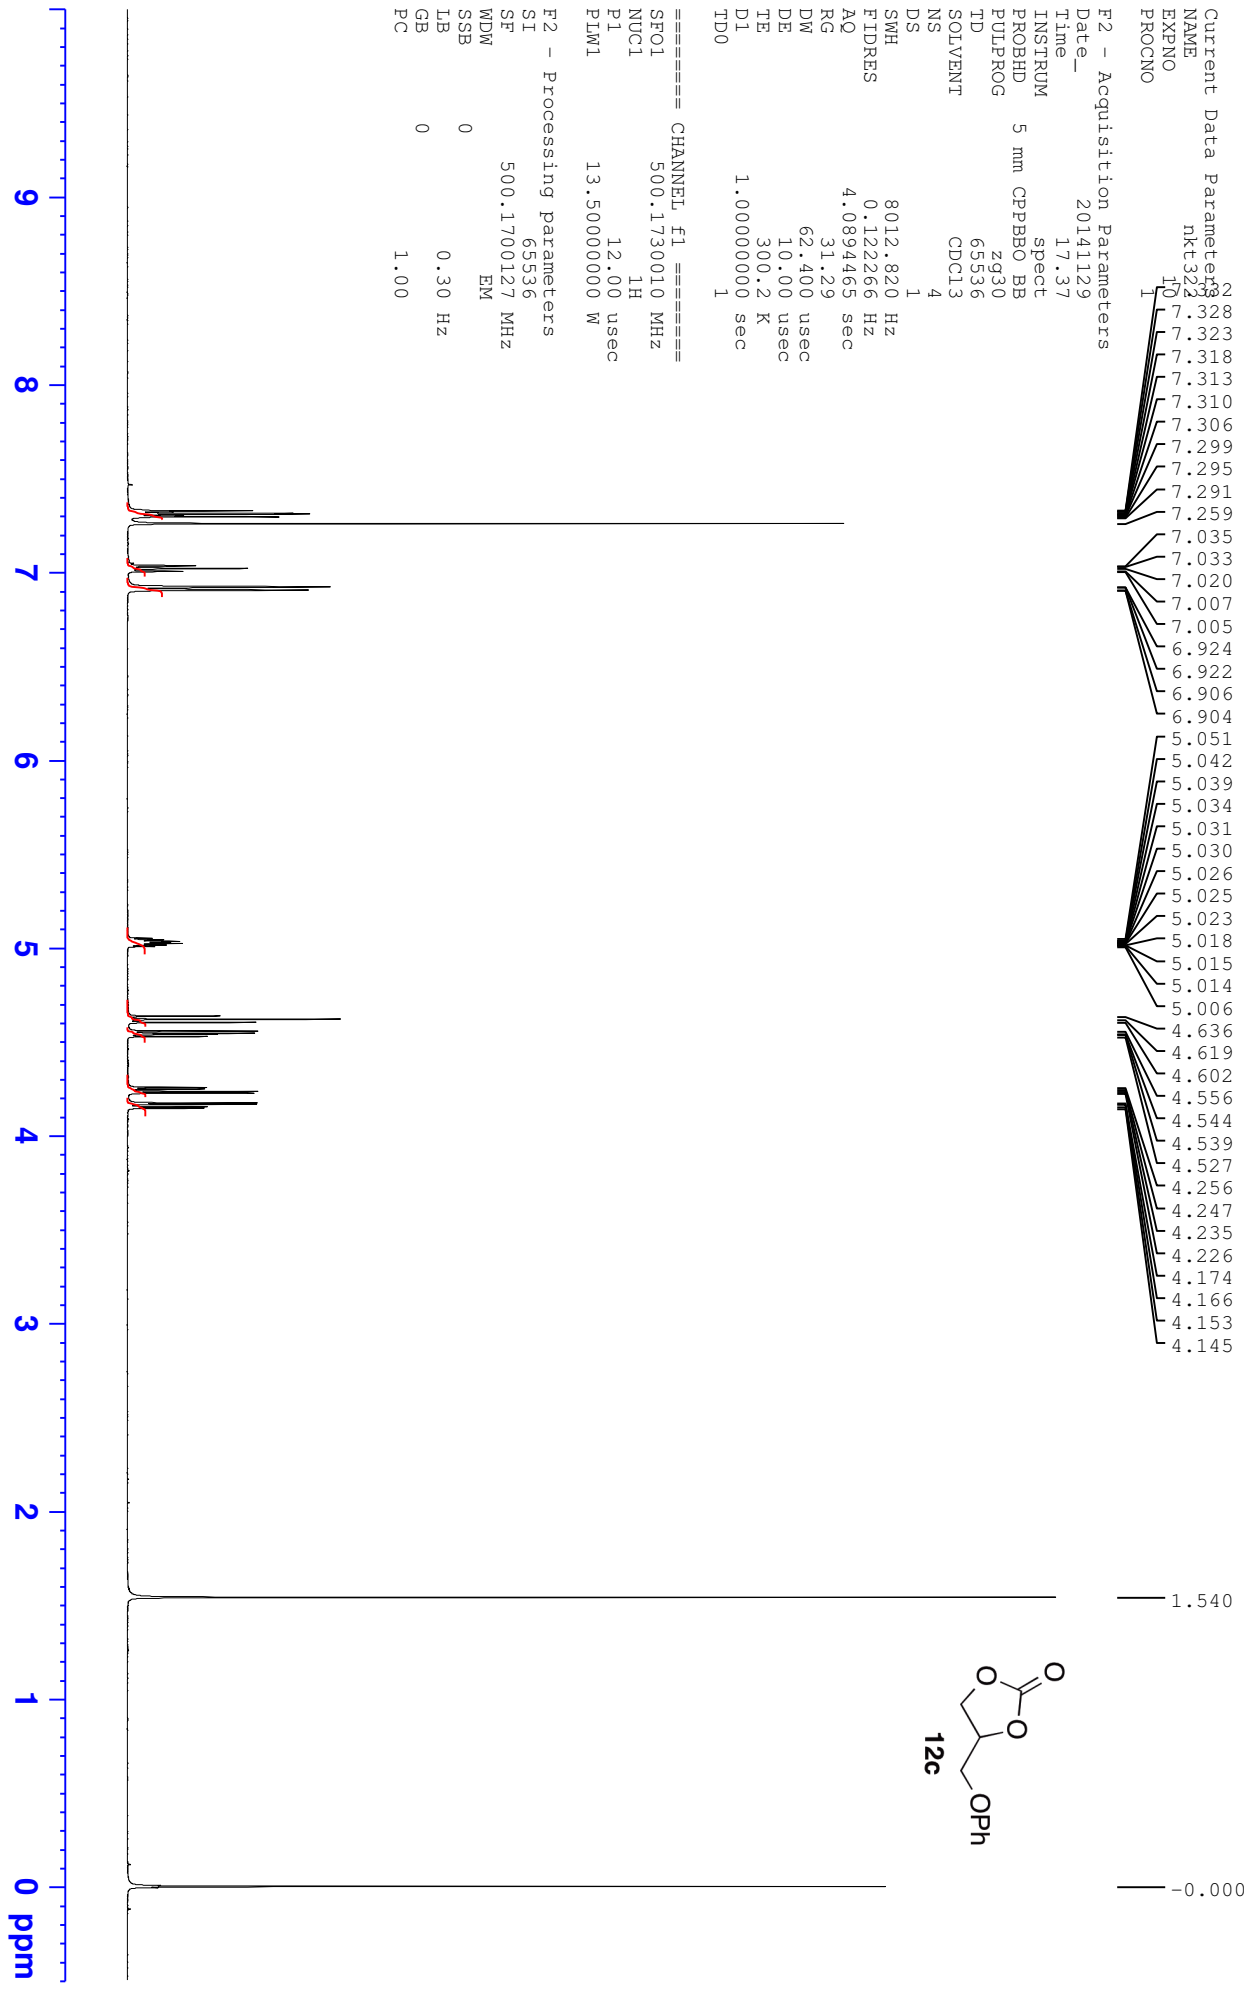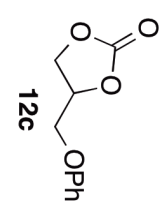

<sup>1</sup>H NMR

Current Data Parameters  
 NAME nkt319  
 EXPNO 10  
 PROCNO 1

F2 - Acquisition Parameters  
 Date\_ 20140911  
 Time 11.03

INSTRUM 5 mm CPPBBO BB  
 PROBHD zq30  
 PULPROG 65536  
 TD 65536  
 SOLVENT GDC13  
 NS 16  
 DS 2  
 SWH 10000.000 Hz  
 FIDRES 0.152588 Hz  
 AQ 3.2767999 sec  
 RG 31.29  
 DW 50.000 usec  
 DE 10.00 usec  
 TE 300.0 K  
 D1 1.00000000 sec  
 TD0 1

==== CHANNEL f1 =====  
 SFO1 500.1730888 MHz  
 NUC1 1H  
 P1 12.00 usec  
 PLW1 13.5000000 W

F2 - Processing parameters  
 SI 65536  
 SF 500.1700084 MHz  
 WDW EM  
 SSB 0  
 LB 0.30 Hz  
 GB 0  
 PC 1.00

- 7.538
- 7.267
- 7.116
- 7.098
- 6.883
- 6.702
- 5.302
- 5.082
- 4.851
- 4.840
- 4.837
- 4.835
- 4.829
- 4.826
- 4.824
- 4.821
- 4.815
- 4.813
- 4.810
- 4.799
- 4.548
- 4.532
- 4.515
- 4.260
- 4.246
- 4.243
- 4.229
- 3.790
- 3.709
- 3.709
- 3.700
- 3.691
- 2.697
- 2.690
- 2.686
- 2.680
- 2.605
- 2.596
- 2.582
- 2.573
- 2.564
- 2.556
- 2.546
- 2.533
- 2.523
- 1.640
- 1.260
- 0.000

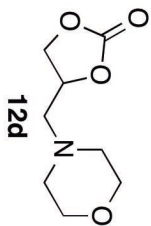

<sup>1</sup>H NMR



Current Data Parameters  
 NAME nkt283  
 EXPNO 20  
 PROCNO 1

F2 - Acquisition Parameters  
 Date\_ 20141129  
 Time 17.41  
 INSTRUM spect  
 PROBHD 5 mm CPPBBO BB  
 PULPROG zg30  
 TD 65536  
 SOLVENT GDC13  
 NS 4  
 DS 1  
 SWH 8012.820 Hz  
 FIDRES 0.122266 Hz  
 AQ 4.0894465 sec  
 RG 31.29  
 DW 62.400 usec  
 DE 10.00 usec  
 TE 300.1 K  
 D1 1.00000000 sec  
 TD0 1

==== CHANNEL f1 =====  
 SFO1 500.1730010 MHz  
 NUC1 1H  
 P1 12.00 usec  
 PLW1 13.50000000 W

F2 - Processing parameters  
 SI 65536  
 SF 500.1700120 MHz  
 WDW EM  
 SSB 0  
 LB 0.30 Hz  
 GB 0  
 PC 1.00

7.359  
7.345  
7.330  
7.296  
7.282  
7.260  
7.189  
7.186  
7.172

5.106  
4.495  
4.478  
4.462  
4.173  
4.162  
4.155  
4.144  
4.114  
4.103  
4.100  
4.098  
4.087  
4.082  
4.075  
4.071  
2.918  
2.906  
2.891  
2.879  
2.872  
2.856  
2.845  
2.829

1.570

-0.000

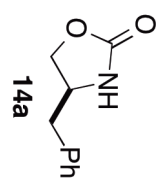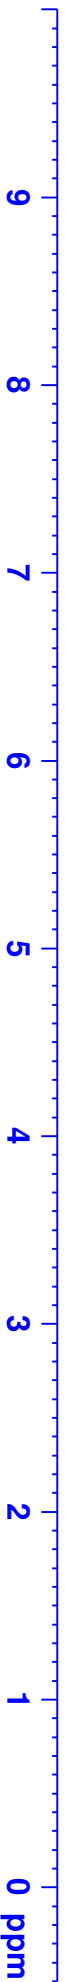

2.035  
1.831  
2.065

1.000

1.040  
1.053  
1.045

2.144

Current Data Parameters  
NAME nkt317  
EXPNO 10  
PROCNO 1

F2 - Acquisition Parameters

Date\_ 20140920  
Time 16:31  
INSTRUM spect  
PROBHD 5 mm CPPBBO BB  
PULPROG zg30  
TD 65536  
SOLVENT GDC13  
NS 8  
DS 1  
SWH 8012.820 Hz  
FIDRES 0.122266 Hz  
AQ 4.0894465 sec  
RG 31.29  
DW 62.400 usec  
DE 10.00 usec  
TE 300.0 K  
D1 1.00000000 sec  
TD0 1

==== CHANNEL f1 =====  
SFO1 500.1730010 MHz  
NUC1 1H  
P1 12.00 usec  
PLW1 13.50000000 W

F2 - Processing parameters  
SI 65536  
SF 500.1700122 MHz  
WDW EM  
SSB 0  
LB 0.30 Hz  
GB 0  
PC 1.00

7.430  
7.417  
7.413  
7.404  
7.402  
7.385  
7.382  
7.371  
7.361  
7.358  
7.353  
7.347  
7.344  
7.342  
7.260

5.263  
4.970  
4.955  
4.939  
4.765  
4.747  
4.730  
4.221  
4.207  
4.203  
4.189

1.551

-0.000

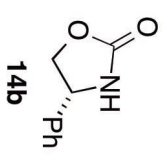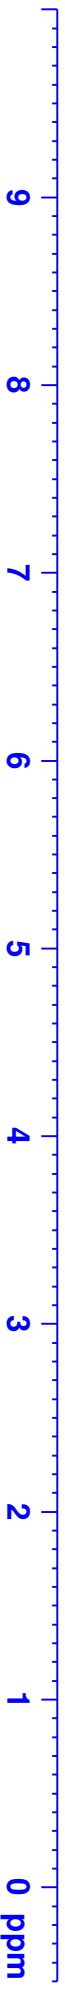

Current Data Parameters  
 NAME: 15  
 EXPNO: 2  
 PROCNO: 1  
 F2 - Acquisition Parameters  
 Date\_: 20141129  
 Time: 17.46  
 INSTRUM: spect  
 PROBHD: 5 mm CPPBBO BB  
 PULPROG: zg30  
 TD: 65536  
 SOLVENT: CDCl3  
 NS: 4  
 DS: 1  
 SWH: 8012.820 Hz  
 FIDRES: 0.122266 Hz  
 AQ: 4.0894465 sec  
 RG: 31.29  
 DW: 62.400 usec  
 DE: 10.00 usec  
 TE: 300.1 K  
 D1: 1.00000000 sec  
 TD0: 1

==== CHANNEL f1 =====  
 SFO1 500.1730010 MHz  
 NUC1 1H  
 P1 12.00 usec  
 PLW1 13.50000000 W  
 F2 - Processing parameters  
 SI 65536  
 SF 500.1700097 MHz  
 WDW EM  
 SSB 0  
 LB 0.30 Hz  
 GB 0  
 PC 1.00

9.877  
9.826  
8.022  
8.020  
7.562  
7.560  
7.551  
7.547  
7.544  
7.535  
7.532  
7.530  
7.446  
7.443  
7.430  
7.418  
7.415  
7.265  
4.968  
4.960  
4.952  
4.947  
4.939  
4.931  
4.926  
4.918  
4.910  
4.469  
4.463  
3.532  
2.110  
2.100  
2.092  
1.658  
1.634  
1.632  
1.628  
1.607  
1.588  
1.578  
1.453  
1.363  
1.354  
1.334  
1.313  
1.310  
1.307  
1.287  
1.281

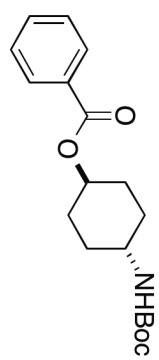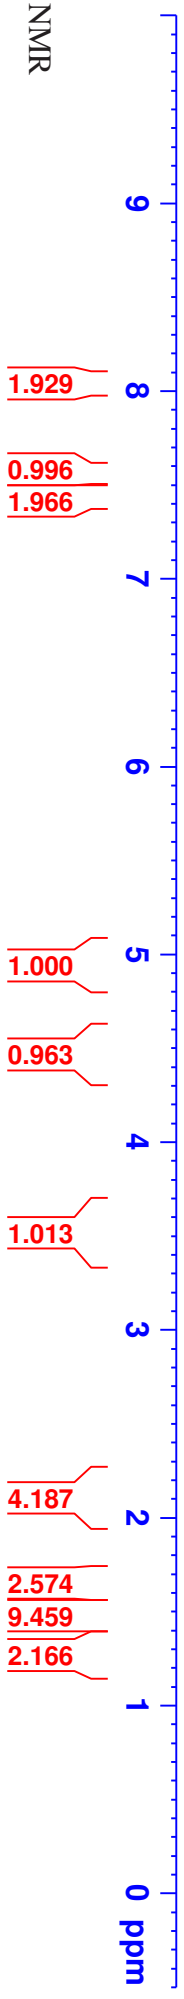

Supplement: c5gc02056e2.pdf [file c5gc02056e2.pdf]
